# Ectodomain shedding and ADAMs in development

Silvio Weber<sup>1</sup> and Paul Saftig<sup>2,\*</sup>

## Summary

Proteolytic enzymes belonging to the A Disintegrin And Metalloproteinase (ADAM) family are able to cleave transmembrane proteins close to the cell surface, in a process referred to as ectodomain shedding. Substrates for ADAMs include growth factors, cytokines, chemokines and adhesion molecules, and, as such, many ADAM proteins play crucial roles in cell-cell adhesion, extracellular and intracellular signaling, cell differentiation and cell proliferation. In this Review, we summarize the fascinating roles of ADAMs in embryonic and adult tissue development in both vertebrates and invertebrates.

**Key words:** ADAM, Notch, Ectodomain shedding, Cell fate determination, Differentiation

## Introduction

Proteins belonging to the ‘A Disintegrin And Metalloproteinase’ (ADAM) family are membrane-anchored proteases that are able to cleave the extracellular domains of membrane-bound proteins in a process known as ‘ectodomain shedding’. Typical substrates of ADAM proteases are growth factors, cytokines, chemokines and their receptors, as well as cell adhesion molecules and differentiation factors (Reiss and Saftig, 2009). ADAMs were initially discovered as novel type I transmembrane proteins with homology to snake venom integrin ligands and that played a functional role during guinea-pig sperm-egg fusion (Blobel et al., 1992). Subsequently, approximately half of the ADAM family members were predicted and then shown to possess zinc-dependent protease activity related to that exhibited by adamalysins metalloproteinases (Wolfsberg et al., 1993; Huxley-Jones et al., 2007). These active ‘shedases’ (ADAM8, 9, 10, 12, 15, 17, 19, 20, 21, 28, 30 and 33) share a typical consensus sequence (HEXGHXXGXXHD) that is present in zinc-binding proteases (Bode et al., 1993). So far, 40 family members have been identified in the mammalian genome (Puente and Lopez-Otin, 2004; Edwards et al., 2008), of which 37 are expressed in mice (most of them in a testis-specific manner) and 22 are thought to be expressed in humans (Table 1). In both mouse and human, intronless coding sequences probably representing pseudogenes (e.g. human ADAM5P and ADAM6) have also been described. The expression of ADAM or ADAM-related proteins has also been described in many different species, including the yeast *Schizosaccharomyces pombe*, the nematode worm *Caenorhabditis elegans*, the frog *Xenopus laevis*, the zebrafish *Danio rerio* and the fruitfly *Drosophila melanogaster* (Alfandari et al., 1997; Nakamura et al., 2004; Huxley-Jones et al., 2007; Iida et al., 2010). It was quickly realized that ADAMs are widely expressed and play fundamental

roles during developmental processes, by regulating cell-cell and cell-matrix interactions and by modulating differentiation, migration, receptor-ligand signaling or repulsion (Becherer and Blobel, 2003).

Following studies of the catalytically active ADAMs, ectodomain shedding emerged as a central biological event. This proteolytic process primarily affects type I and type II transmembrane proteins, although glycosylphosphatidylinositol (GPI)-anchored proteins have also been reported as targets for surface shedding (Vincent et al., 2001). It is still unclear whether multipass transmembrane proteins are also substrates for ADAMs. However, in most cases, ectodomain shedding leads to the modulation of signaling activity on host and neighboring cells either through downregulation of cell surface receptors or increased liberation of soluble ligands such as tumor necrosis factor  $\alpha$  (TNF $\alpha$ ) or epidermal growth factor receptor (EGFR) ligands (reviewed by Blobel, 2005; Edwards et al., 2008; Reiss and Saftig, 2009). Additionally, ectodomain shedding usually represents a rate-limiting step for further cleavage events within the plasma membrane, a process called regulated intermembrane proteolysis (RIP) that is best understood for the proteolytic processing of Notch receptors (Kopan and Ilagan, 2009; Andersson et al., 2011). RIP can be mediated either by the  $\gamma$ -secretase complex (for type I transmembrane proteins) or the signal peptide peptidase-like (SPPL) proteases (for type II transmembrane proteins) (Fluhrer and Haass, 2007; De Strooper and Annaert, 2010). Ectodomain shedding is a prerequisite for intramembrane proteolysis in the case of type I transmembrane substrates. The same apparently holds true for the SPPL family members 2A and 2B (Martin et al., 2008; Fluhrer et al., 2009; Martin et al., 2009) whereas no information about the mode of RIP is available yet for SPPL2C and SPPL3.

Dysregulation of a properly regulated shedding activity has been shown to be a crucial factor in the development of complex pathologies such as cancer, cardiovascular disease, inflammation and neurodegeneration (Duffy et al., 2009b). Following this, ADAMs have been implicated in a number of human diseases (Box 1). Furthermore, gain- and loss-of-function experiments in various model organisms have revealed that a number of ADAMs are needed to control tissue development and homeostasis. Here, we aim to provide an overview of our current knowledge about the role of ADAM proteases in developmental processes.

## Structure and localization of ADAM proteases

ADAMs have a typical modular structure (Fig. 1): they contain a cytoplasmic domain (CD), a transmembrane domain (TMD), an EGF-like domain (EGF) and/or a cysteine-rich domain, a disintegrin domain (DIS), and a protease (PROT) domain, which may or may not contain an active site. They also possess an N-terminal signal sequence that directs the protease into the secretory pathway as a type I transmembrane protein. Adjacent to this signal sequence is a prodomain that controls correct protein folding and is removed by pro-protein convertases or autocatalytic processes during its transit through the Golgi apparatus (Lum et al., 1998; Roghani et al., 1999; Howard et al., 2000; Schlomann et al., 2002).

<sup>1</sup>Heart Research Centre Göttingen, Universitätsmedizin Göttingen, Department of Cardiology and Pneumology, Georg-August-University Göttingen, Germany.

<sup>2</sup>Biochemical Institute, Christian-Albrechts-University Kiel, Olshausenstr. 40, D-24098 Kiel, Germany.

\* Author for correspondence (psaftig@biochem.uni-kiel.de)

Table 1. Human ADAM proteases and their suggested functional roles

| Human ADAM gene | Proteolytic activity | Other names                                            | Orthologs in other species                                                                                                                                                                                                                                                              | Suggested function                                                                                                                                                                                                                                                                                                                 |
|-----------------|----------------------|--------------------------------------------------------|-----------------------------------------------------------------------------------------------------------------------------------------------------------------------------------------------------------------------------------------------------------------------------------------|------------------------------------------------------------------------------------------------------------------------------------------------------------------------------------------------------------------------------------------------------------------------------------------------------------------------------------|
| ADAM1           | No                   | fertilin alpha, PH-30a, Ftna, FTNAP                    | <i>Bos taurus</i> , <i>Cavia porcellus</i> , <i>Gorilla gorilla</i> , <i>Macaca fascicularis</i> , <i>Mus musculus</i> , <i>Oryctolagus cuniculus</i> , <i>Papio hamadryas anubis</i> , <i>Pongo pygmaeus</i> , <i>Rattus norvegicus</i> , <i>Saguinus oedipus</i> , <i>Tupaia glis</i> | Possibly involved in sperm-egg fusion                                                                                                                                                                                                                                                                                              |
| ADAM2           | No                   | fertilin beta, PH-30b, FTNB, CRYN1, CRYN2, PH30        | <i>B. taurus</i> , <i>C. porcellus</i> , <i>M. fascicularis</i> , <i>M. musculus</i> , <i>O. cuniculus</i> , <i>R. norvegicus</i> , <i>Sus scrofa</i>                                                                                                                                   | Possibly involved in sperm-egg fusion                                                                                                                                                                                                                                                                                              |
| ADAM3A          | No                   | tMDC, CYRN1 (cyritestin), TAZ83                        | <i>M. musculus</i> , <i>M. fascicularis</i> , <i>R. norvegicus</i>                                                                                                                                                                                                                      | Possibly involved in sperm-egg fusion                                                                                                                                                                                                                                                                                              |
| ADAM5P          | No                   | tMDVII                                                 | <i>C. porcellus</i> , <i>M. fascicularis</i> , <i>M. musculus</i>                                                                                                                                                                                                                       | Unknown, possibly a pseudogene                                                                                                                                                                                                                                                                                                     |
| ADAM6           | No                   | tMDCIV, C14orf96                                       | <i>C. porcellus</i> , <i>M. fascicularis</i> , <i>M. musculus</i> , <i>O. cuniculus</i> , <i>R. norvegicus</i>                                                                                                                                                                          | Unknown, possibly a pseudogene                                                                                                                                                                                                                                                                                                     |
| ADAM7           | No                   | EAPI, GP83, GP-83                                      | <i>M. musculus</i> , <i>M. fascicularis</i> , <i>R. norvegicus</i>                                                                                                                                                                                                                      | Possibly involved in sperm-egg fusion                                                                                                                                                                                                                                                                                              |
| ADAM8           | Yes                  | CD156, MS2, MGC13495                                   | <i>M. musculus</i> , <i>Danio rerio</i>                                                                                                                                                                                                                                                 | Involved in cell adhesion during neurodegeneration; a target for allergic respiratory diseases, including asthma                                                                                                                                                                                                                   |
| ADAM9           | Yes                  | MCMP, MDC9, KIAA0021, Mltng, meltrin gamma             | <i>B. taurus</i> , <i>M. musculus</i> , <i>S. scrofa</i> , <i>Xenopus laevis</i>                                                                                                                                                                                                        | Involved in induced ectodomain shedding of membrane-anchored heparin-binding EGF-like growth factor; suggested to cleave APP at the $\alpha$ -secretase site                                                                                                                                                                       |
| ADAM10          | Yes                  | CD156c, HsT18717, MADM, kuz                            | <i>B. taurus</i> , <i>Caenorhabditis elegans</i> , <i>D. rerio</i> , <i>Drosophila melanogaster</i> , <i>Gallus gallus</i> , <i>M. musculus</i> , <i>R. norvegicus</i> , <i>S. scrofa</i> , <i>X. laevis</i>                                                                            | Involved in shedding of various transmembrane proteins, including cadherins Major Notch-site 2 protease; $\alpha$ -secretase for APP; controls wound healing, neurogenesis, skin homeostasis                                                                                                                                       |
| ADAM11          | No                   | MDC                                                    | <i>M. musculus</i> , <i>X. laevis</i>                                                                                                                                                                                                                                                   | Candidate tumor suppressor gene for human breast cancer, pain transmission, synaptic modulation                                                                                                                                                                                                                                    |
| ADAM12          | Yes                  | MCMP, MCMPMltna, MLTN, MLTNA                           | <i>B. taurus</i> , <i>M. musculus</i> , <i>Coturnix coturnix</i>                                                                                                                                                                                                                        | Involved in myogenesis and skeletal muscle regeneration; upregulated in tumor progression; involved in macrophage-derived giant cell (MGC) and osteoclast formation from mononuclear precursors                                                                                                                                    |
| ADAM15          | Yes                  | metargidin, MDC15                                      | <i>M. musculus</i> , <i>R. norvegicus</i>                                                                                                                                                                                                                                               | Involved in cell adhesion through integrin binding; involved in wound healing; mediates heterotypic T-cell interactions; cleaves E-cadherin in response to growth factor deprivation; plays a role in glomerular cell migration and pathological neovascularization; involved in cartilage remodeling and sperm-egg binding        |
| ADAM17          | Yes                  | TACE, CD156B, MGC71942, cSVP                           | <i>D. rerio</i> , <i>Cricetulus griseus</i> , <i>D. melanogaster</i> , <i>M. musculus</i> , <i>R. norvegicus</i> , <i>S. scrofa</i>                                                                                                                                                     | Cleaves TNF $\alpha$ and is responsible for proteolytic release of several other cell-surface proteins, including p75 TNF receptor, interleukin 1 receptor type II, p55 TNF receptor, TGF $\alpha$ , L-selectin, growth hormone receptor, MUC1 and amyloid precursor protein; possibly involved in the activation of Notch pathway |
| ADAM18          | No                   | ADAM27, MGC41836, MGC88272, tMDCIII                    | <i>M. musculus</i> , <i>R. norvegicus</i> , <i>M. fascicularis</i>                                                                                                                                                                                                                      | Possibly involved in sperm-egg fusion                                                                                                                                                                                                                                                                                              |
| ADAM19          | Yes                  | MADDAM, MLTNB, FKSG34                                  | <i>M. musculus</i> , <i>C. coturnix</i>                                                                                                                                                                                                                                                 | Shedding of beta-type neuregulin isoforms involved in neurogenesis and synaptogenesis; possibly involved in osteoblast differentiation and/or osteoblast activity in bone                                                                                                                                                          |
| ADAM20          | Yes                  |                                                        |                                                                                                                                                                                                                                                                                         | Possibly involved in sperm-egg fusion; testis-specific expression                                                                                                                                                                                                                                                                  |
| ADAM21          | Yes                  | ADAM31, MGC125389                                      | <i>M. musculus</i>                                                                                                                                                                                                                                                                      | Possibly involved in sperm-egg fusion and in epithelia functions                                                                                                                                                                                                                                                                   |
| ADAM22          | No                   | MDC2, MGC149832                                        | <i>M. musculus</i> , <i>X. laevis</i>                                                                                                                                                                                                                                                   | Ligand for integrin in the brain; involved in regulation of cell adhesion and in inhibition of cell proliferation; neuronal receptor for LGI1                                                                                                                                                                                      |
| ADAM23          | No                   | MDC3                                                   | <i>M. musculus</i>                                                                                                                                                                                                                                                                      | Involved in cell-cell and cell-matrix interactions in brain                                                                                                                                                                                                                                                                        |
| ADAM28          | Yes                  | ADAM23, MDC-Lm, MDC-Ls, MDCL, eMDCII                   | <i>M. musculus</i> , <i>G. gallus</i> , <i>M. fascicularis</i> , <i>R. norvegicus</i>                                                                                                                                                                                                   | Possible role during lymphocyte emigration; shedding of lymphocyte surface target proteins, such as FASL and CD40L; might be involved in sperm maturation                                                                                                                                                                          |
| ADAM29          | No                   | svph1, CT73                                            | <i>M. musculus</i>                                                                                                                                                                                                                                                                      | Involved in spermatogenesis and fertilization                                                                                                                                                                                                                                                                                      |
| ADAM30          | Yes                  | svph4                                                  | <i>M. musculus</i>                                                                                                                                                                                                                                                                      | Involved in spermatogenesis and fertilization                                                                                                                                                                                                                                                                                      |
| ADAM32          | No                   | FLJ26299, FLJ29004                                     | <i>M. musculus</i> , <i>R. norvegicus</i>                                                                                                                                                                                                                                               | Involved in spermatogenesis and fertilization                                                                                                                                                                                                                                                                                      |
| ADAM33          | Yes                  | FLJ36751, MGC1498823, FLJ35308, RP5-964F7.2, dJ964F7.1 | <i>M. musculus</i> , <i>Xenopus</i> (suggested ADAM13)                                                                                                                                                                                                                                  | Possibly involved in asthma and bronchial hyper-responsiveness                                                                                                                                                                                                                                                                     |

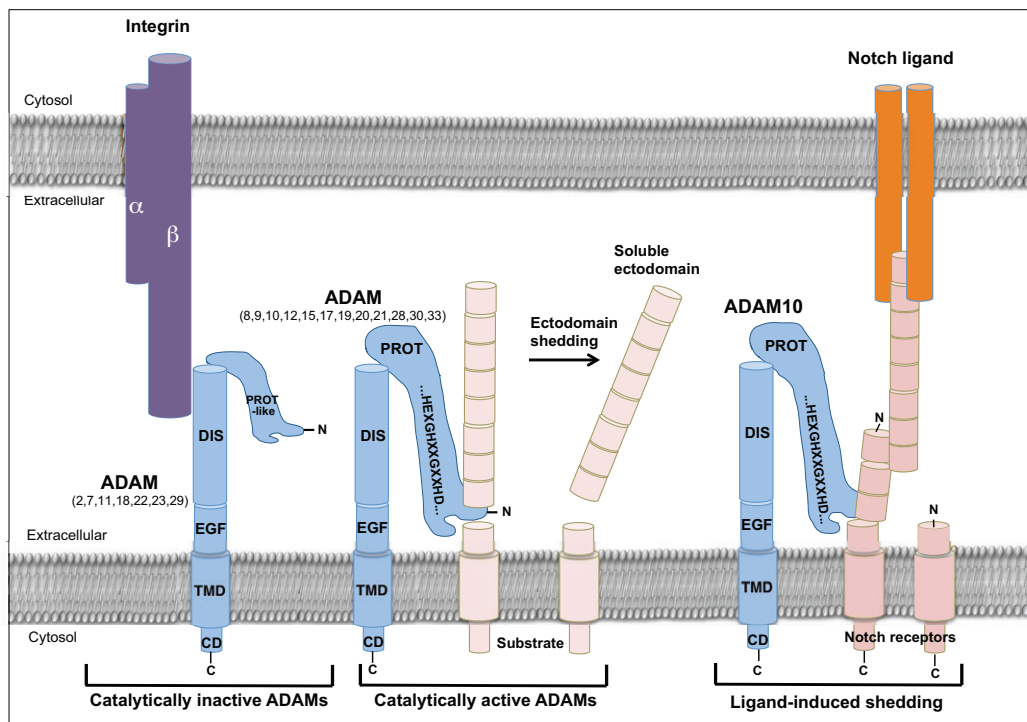

**Fig. 1. Proteolytically active and inactive ADAMs.** ADAMs (blue) contain a cytoplasmic domain (CD), a transmembrane domain (TMD), an EGF-like domain (EGF), a disintegrin domain (DIS) and the protease (PROT) domain, which may or may not (or PROT-like) contain an active site (HEXGHXXGXXHD). Catalytically inactive ADAMs seem to be important for cell-cell adhesion, and this function is mainly mediated through interactions with integrins (purple) on neighboring cells. The protease-containing ADAMs are involved in ectodomain shedding of type I or type II transmembrane proteins (pink), leading to the release of a soluble extracellular domain and the generation of a membrane stub. In the case of ADAM10 (example shown on right), it is well documented that binding of the Notch receptor (pink) to one of its ligands (orange) located on a neighboring cell induces ectodomain shedding. The remaining membrane-bound stub is subject to intramembrane cleavage by the  $\gamma$ -secretase complex (not shown here).

Interestingly, at steady state, the vast majority of endogenous ADAM10 and ADAM17 is localized in the endoplasmic reticulum (ER) and Golgi apparatus and little protein is observed at the plasma membrane where ectodomain shedding occurs (Schlondorff et al., 2000; Gutwein et al., 2003). For ADAM10, an ER-retention motif within the ADAM10 intracellular C-terminal tail is also observed (Marcello et al., 2010), and the binding of proteins such as tetraspanins in the case of ADAM10 (Prox et al., 2012) and iRHOM2 in the case of ADAM17 (Adrain et al., 2012; McIlwain et al., 2012) can trigger the export of these proteases from the endoplasmic reticulum. The binding of iRHOM2 (also known as RHBDF2) to ADAM17 also contributes to innate immunity and pathogen defense (McIlwain et al., 2012). Interestingly, a very recent study revealed mutations in the gene encoding for iRomb2 in a form of esophageal cancer with disturbed EGFR signaling (Blaydon et al., 2012).

Twelve of the human ADAMs contain a characteristic active site (HEXGHXXGXXHD) in the metalloprotease domain (Fig. 1). The X-ray structures of the catalytic domains of ADAM17 and ADAM33 revealed a zinc-binding motif with three conserved histidine residues and a methionine-turn in the active site helix (Maskos et al., 1998; Orth et al., 2004). The catalytic part of ADAMs is characterized by a globular structure with two subdomains and an active cleft between these subdomains (Gomis-Ruth, 2003). The groove between these subdomains contains a catalytic zinc atom that directs cleavage specificity, and synthetic metalloprotease inhibitors are designed to fit in this groove

(Gomis-Ruth, 2003; Bode et al., 1993). Regulation of catalytic activity, and possibly also of substrate targeting, is mainly mediated by the cysteine-rich domain (Milla et al., 1999; Smith et al., 2002; Janes et al., 2009). This domain harbors a hypervariable region. The crystal structure of vascular apoptosis-inducing factor-1 (VAP1; also known as AOC3), a conserved snake venom homolog of ADAMs, suggested that the extracellular metalloprotease/disintegrin/cysteine-rich structure presents as a C-shaped molecule, with part of the cysteine-rich domain being in close contact with the catalytic site in the metalloprotease domain. This region seems to be important for determining substrate specificity or for regulating protease activity (Takeda et al., 2006). In non-proteolytically active ADAMs, the disintegrin domain was suggested to be critical for binding to surface molecules, including integrins, and thereby regulates cell-cell adhesion (White, 2003) (Fig. 1). However, this concept has been challenged, because the inhibition of ADAM receptors using integrin function-blocking antibodies or integrin-lacking eggs did not affect sperm-egg binding and fusion (He et al., 2003). The EGF-like domain, which is present in most ADAMs, is thought to contribute to the regulation of substrate binding to the cysteine-rich domain and to binding to cell surface proteoglycans (Zolkiewska, 1999; Iba et al., 2000; Janes et al., 2005). The corresponding membrane proximal domains of ADAM17 is involved in protease multimerization and ligand recognition (Lorenzen et al., 2011; Lorenzen et al., 2012). C-terminal to this domain is a short and rather flexible extracellular stalk region followed by the hydrophobic membrane-spanning



### Box. 1. ADAMs and their possible involvement in disease

Dysregulation of ADAMs can contribute to the development of human disease. A number of ADAMs are linked to the pathogenesis of cancer, asthma, infection and inflammation, cardiovascular disorders and neurological disorders. Furthermore, the overexpression of ADAMs is associated with human cancer (e.g. ADAM8 in pancreatic cancer, ADAM9, 12, 15, 17 in breast cancer, ADAM10 and 15 in prostate cancer, ADAM12 in bladder cancer, ADAM19 in gliomas). In addition, ectodomain shedding of different substrates by ADAMs has been found to be linked with rheumatoid arthritis (ADAM8, ADAM17), inflammation (ADAM10, ADAM17), ageing (ADAM10), Alzheimer's disease (ADAM10), allergic reactions (ADAM10), multiple sclerosis (ADAM17), diabetes (ADAM17), asthma (ADAM33), cardiovascular disease (ADAM10, ADAM17) and psoriasis (ADAM10, ADAM33). Depending on the disease context, modulation of ADAM function is considered to be an interesting therapeutic option. Upregulation of ADAM10, for example, is thought to decrease the burden of  $\beta$ -amyloid production, thereby possibly preventing the progressive neurodegeneration found in the brains of Alzheimer's disease patients. By contrast, downregulation of ADAM10 and ADAM17 in combination with HER2 (ERBB2) antibody treatment led to clinical improvement in breast cancer patients. Accordingly, downregulation of ADAM17 activity during acute inflammation and sepsis or upregulation after stress-induced tissue damage are reasonable future therapeutic options. However, it should be considered that long-term regulation of at least ADAM10 and ADAM17 will be challenging, given the pronounced phenotypes of ADAM10 and 17 knockout mouse models.

region. Interestingly, the cytosolic tails of ADAMs are very diverse in terms of length, sequence and their capacity to bind cytosolic proteins (Cao et al., 2002; Diaz-Rodriguez et al., 2002; Mori et al., 2003; Seals and Courtneidge, 2003; Sundberg et al., 2004; Wild-Bode et al., 2006; Zhong et al., 2008; Marcello et al., 2010). There is an increasing number of reports highlighting the importance of this cytosolic domain for the regulation of ADAM proteolytic activity, intracellular transport, and localization, as well as for cell signaling (reviewed by Edwards et al., 2008). Unfortunately, the structure of the entire extracellular part of an ADAM has not yet been determined. Knowledge of this structure would certainly be of great value for understanding the 'communication' between individual domains and for visualizing the mode of interaction with membrane substrates.

### ADAM proteases: from discovery to evolution

ADAM1 and ADAM2 were the first characterized ADAM proteases (Blobel et al., 1992; Wolfsberg et al., 1993). Soon after, ADAM12 was found to be important for myoblast fusion (Yagami-Hiromasa et al., 1995) and the ADAM10 ortholog *kuzbanian* in *Drosophila* was identified to control cell differentiation during neurogenesis (Rooke et al., 1996; Pan and Rubin, 1997) and axon extension (Fambrough et al., 1996). At the same time, the prominent role of ADAM17 for infection and immunity was realized when it was discovered to mediate the release of TNF $\alpha$  from cells (Black et al., 1997; Moss et al., 1997), and it was hence referred to as TNF $\alpha$  cleavage enzyme, or TACE. Shortly after, the first knockout mouse studies revealed an essential developmental role for ADAM17 (Peschon et al., 1998) as well as a role for the catalytically inactive ADAM2 in fertilization (Cho et al., 1998). In the same year, the three-dimensional structure of the catalytic domain of ADAM17 in complex with a hydroxamic acid inhibitor

was resolved (Maskos et al., 1998). In 1999, Lammich and colleagues identified ADAM10 as a major candidate involved in the non-amyloidogenic  $\alpha$ -secretase processing of the amyloid precursor protein (APP) (Lammich et al., 1999), which plays a central role in the pathogenesis of Alzheimer's disease. Since then, therapeutic approaches to stimulate ADAM10 activity are being tested to prevent the excessive production of the neurotoxic amyloid beta peptide in Alzheimer's disease (Endres and Fahrenholz, 2010; Saftig and Reiss, 2011). More recent and ongoing studies are exploring ADAMs as potential targets for the treatment of malignancies that are dependent on human epidermal growth factor receptor ligands or TNF $\alpha$  (Duffy et al., 2009a).

From an evolutionary point of view, it appears that the two best-studied ADAM proteases in mammals, ADAM10 and ADAM17, are somewhat separated from the other ADAMs [see overview by Edwards et al. (Edwards et al., 2008)]. This is exemplified by comparisons of the genomes from *Ciona intestinalis*, *Danio rerio*, *Drosophila melanogaster*, *Caenorhabditis elegans*, sea urchin and rodents (Puentes and Lopez-Otin, 2004; Angerer et al., 2006; Huxley-Jones et al., 2007). In the sea squirt *Ciona intestinalis*, possibly the closest invertebrate relative to humans, two subgroups of ADAM proteases were identified, with one subgroup (ADAMa, ADAMb) representing orthologs for ADAM17 and ADAM10 and the other subgroup (ADAMc1, ADAMc2) appearing to be related to human ADAMs 2, 7, 8, 9, 11, 12, 15, 17, 19, 22, 23, 28, 32 and 33. The remaining ADAMs might thus have appeared later during vertebrate evolution (Huxley-Jones et al., 2007). In *Drosophila*, the genes encoding kuzbanian and kuzbanian-like (*kuz* and *Kul*) correspond to that encoding ADAM10, and there is one orthologous gene (*Tace*) for ADAM17 and two (*Neu3*, *mmd*) for the other ADAM members (Meyer et al., 2011). Interestingly, despite the apparent central role of ADAM10 in Notch-regulated developmental processes, there is no ortholog in the sea urchin for ADAM10 but two orthologs for ADAM17- and ADAM15-related genes (Angerer et al., 2006).

### ADAMs: a protein family with diverse functions and mechanisms of regulation

Proteolytically active ADAMs can control the fate of cell surface molecules in a number of different ways (Fig. 2). For example, ectodomain shedding at the surface of a cell can trigger signaling events within the same cell (Fig. 2A). Alternatively, the released soluble factors can interact in a trans-manner with receptors on cells that may be some distance away from the cell on which shedding has occurred (Fig. 2A). What then happens to the membrane stubs remaining after ectodomain shedding? In most cases, RIP via activity of the  $\gamma$ -secretase complex or SPPLs leads to the release of intracellular fragments that have a direct or indirect influence on transcriptional activity (Fig. 2B). The third consequence of ectodomain shedding at the same cell or a neighboring cell is the regulation of the half-life of surface molecules and the inactivation of receptors or cell adhesion proteins, which is a process that can occur in parallel to the endocytosis of such cell-surface proteins (Fig. 2C). This is exemplified by the interaction of EphB receptors with E-cadherin (cadherin 1) and with the metalloproteinase ADAM10 at sites of adhesion. This activation induces shedding of E-cadherin by ADAM10 and results in asymmetric localization of E-cadherin and, as a consequence, in differences in cell affinity between EphB receptor-positive and ephrin-B-positive cells (Solanas et al., 2011). Another example is the control of neuroepithelial cell adhesion function through the Huntington's disease gene product, huntingtin,

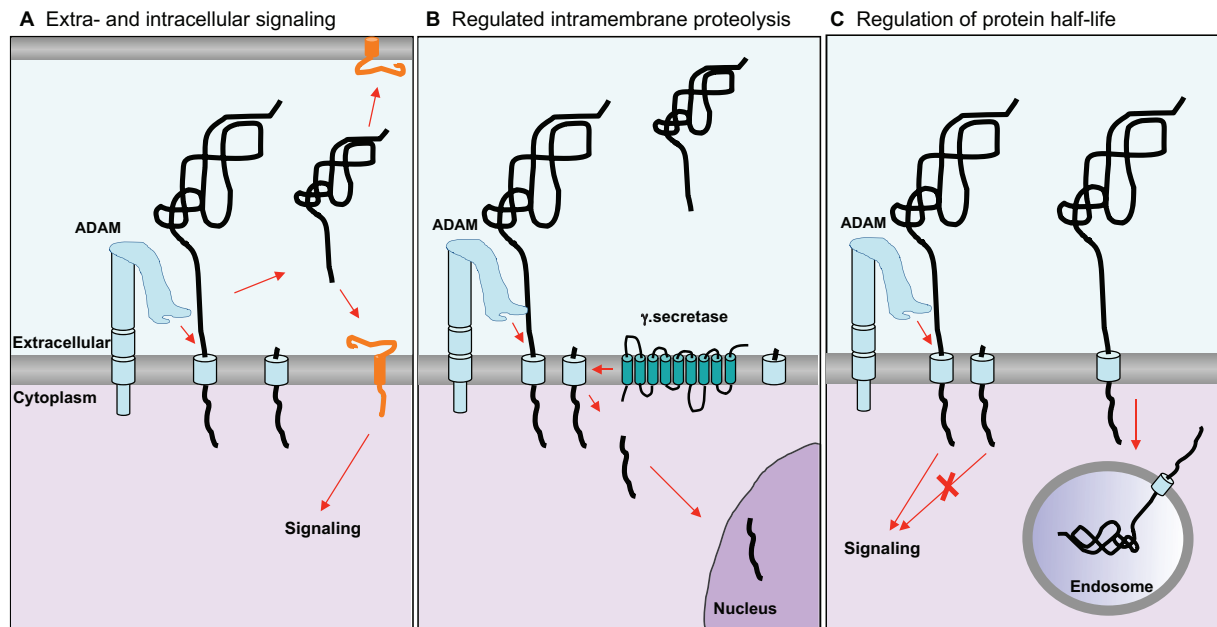

**Fig. 2. ADAM activity and intracellular and extracellular signaling.** Proteolytically active ADAMs can control the fate of cell surface molecules via three possible mechanisms: **(A)** the activity of ADAMs (blue) can promote extracellular and intracellular signaling by releasing soluble factors (black) that are able to bind to receptors (orange) on other cells or on the same cell; **(B)** ADAM activity can result in the subsequent activation of the regulated intramembrane proteolysis (RIP) pathway. In this pathway, the activity of the  $\gamma$ -secretase complex (green) or signal peptide peptidase-like proteases (SPPLs; not shown) leads to the liberation of intracellular fragments that are able to translocate to the nucleus and activate gene transcription; **(C)** the shedding of receptors or adhesion molecules by ADAMs is a way to regulate the half-life of these transmembrane proteins at the cell surface, a process that occurs in parallel to the endocytosis of surface proteins.

by the regulation of ADAM10 and N-cadherin (cadherin 2) shedding (Lo Sardo et al., 2012).

Taking these mechanisms into account, it is evident that ADAMs exert diverse effects on the behavior of cells. Accordingly, ADAM functions are mainly defined by the selective use of substrates, which are dependent on the cell type-specific expression pattern and the subcellular localization of the substrate and the protease.

The best-studied processing events carried out by ADAM proteases include the shedding of EGFR ligands by ADAM17, the proteolytic processing of the Notch1 receptor by ADAM10 (Fig. 3), and the processing of APP by ADAM10. This is perhaps because a defect in the proteolytic processing of EGFR ligands and also of Notch1 has severe consequences for normal development in animals and has been associated with human diseases, including cancer (Peschon et al., 1998; Hartmann et al., 2002; Kenny and Bissell, 2007; Moss et al., 2008; Sulis et al., 2011). Apart from these established substrates, an increasing number of type I and type II transmembrane proteins (reviewed by Reiss and Saftig, 2009) are subject to ADAM-mediated proteolysis (Table 2), and diverse functions ranging from development to the modification of cell adhesion, migration of cells, cytokine and intracellular signaling are related to these shedding events. Interestingly, and as illustrated in Table 2, some of these substrates can be used by different ADAMs, whereas others appear to be specific for an individual ADAM protease. This also highlights the need for a better understanding of how the substrate specificity and proteolytic activity of ADAMs are determined.

ADAM proteases themselves are also subjected to specific regulation and activation processes. It is known that, in addition to constitutive cleavage, factors such as osmotic and mechanical

stress, G protein-coupled receptor activation, activation of protein kinase C, increase in intracellular calcium, serum factors and growth factors can trigger the proteolytic activity of ADAMs (reviewed by Huovila et al., 2005). It has also been reported that transcriptional control, alternative splicing, post-translational modifications (such as pro-domain removal), protein-protein interactions (such as the above-mentioned interaction with iRHOM2 or tetraspanins), the presence of natural inhibitors of ADAMs [such as tissue inhibitors of metalloproteinases (TIMPs)], self-shedding and the intracellular trafficking of ADAMs are major determinants for the activity of ADAMs (Edwards et al., 2008; Reiss and Saftig, 2009) (summarized in Fig. 4).

### Revealing the role of ADAM proteases in non-mammalian models

The study of ADAMs in non-mammalian models played a key role in unraveling their functions in neurogenesis, neural crest cell and myoblast migration, heart development, and the development of blood cell circulation (see examples below). Many of the insights into these processes originated from gain- and loss-of-function experiments in bird or frog embryos, and in fish, nematodes and flies (reviewed by Alfandari et al., 2009). This is exemplified by the neurogenic Notch1-specific phenotype of loss-of-function mutants of ADAM10 (Kuzbanian) in *Drosophila*. These mutants, which exhibit abnormally enlarged neural tissues and an impaired axon extension process, revealed a role for the ADAM10 protease in the lateral inhibition event that leads to selective differentiation of neuronal cells (Fambrough et al., 1996; Rooke et al., 1996). The mutants also showed defects in heart morphogenesis (Albrecht et al., 2006). Interestingly, the selective expression of a dominant-negative mutant of Kuzbanian lacking the metalloproteinase

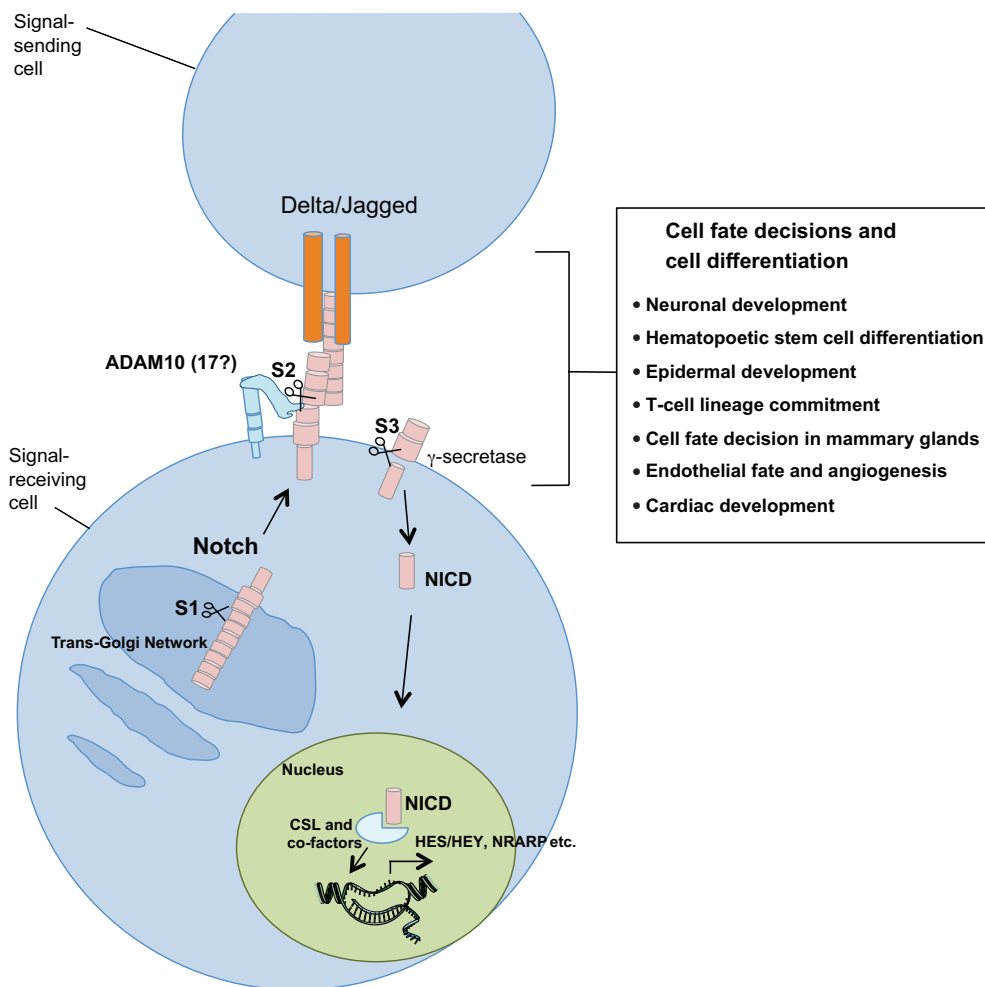

**Fig. 3. Notch processing by ADAMs regulates central developmental processes.** Notch receptor cleavage by different proteases (during cleavages S1, S2 and S3) is needed to trigger the signaling cascade. The S1 cleavage is involved in regulating the surface expression of Notch receptors. Binding of a Notch ligand (e.g. Delta or Jagged) to the Notch receptor (e.g. Notch1) then triggers the S2 cleavage, which is in most cases mediated by ADAM10 (blue). The remaining membrane stub of the Notch receptor is then subject to intramembrane proteolysis mediated by the  $\gamma$ -secretase complex (composed of presenilin, nicastrin, Aph1 and Pen-2), releasing (in the S3 cleavage) the Notch intracellular domain (NICD). After translocation into the nucleus, the NICD associates with the transcription factor CSL (human CBF1, *Drosophila* Suppressor of Hairless, *C. elegans* LAG-1; also known as RBPJ) and other co-factors and triggers gene expression of Notch-responsive genes (e.g. *Hes/Hey*, *Nrarp*). This influence of ADAM-cleavage on the Notch pathway thereby affects cell fate decisions, cell differentiation and important developmental processes, as indicated on the right.

domain (Pan and Rubin, 1997) led to eye and wing phenotypes in *Drosophila* that were almost identical to Notch loss-of-function mutants. In addition, biochemical experiments showed that the processing of Notch at the extracellular juxtamembrane region was impaired in cells that express the dominant-negative ADAM10. This cleavage is absolutely required to initiate the Notch signaling pathway. The central role of ADAM10 for Notch signaling was also confirmed in several studies analyzing the role of the *C. elegans* ADAM10 ortholog (SUP-17); SUP-17-deficient worms exhibit a Notch (LIN-12)-like defect in gonadogenesis. This defect could be partially rescued by the ADAM17 ortholog ADM-4, suggesting that ADAM17 can also contribute, at least when ADAM10 is absent, to the initiation of Notch signaling (Wen et al., 1997; Jarriault and Greenwald, 2005). *C. elegans* mutants that lack only ADM-4 are viable with no overt phenotypical alterations, suggesting that ADAM17-cleavage events are not directly needed for worm development (Jarriault and Greenwald, 2005). Specific phenotypes in flies or worms have not been reported for the other proteolytically active ADAMs (ADAM9, 12, 13, 19 and 33) (Alfandari et al., 2009). This is in line with the lack of severe developmental phenotypes in mice lacking one of these proteases (Table 3), suggesting a redundant function of these proteases. However, in earlier studies, the contribution of *Xenopus laevis* ADAM13 was investigated and, based on expression analyses, ADAM13 was suggested to be involved in neural crest cell adhesion, migration and myoblast differentiation (Alfandari et al.,

1997). Furthermore, cranial neural crest development in *Xenopus* seems to depend on cleavage of cadherin-11 by ADAM9 and ADAM13 (McCusker et al., 2009). The extracellular domain of cadherin-11 stimulates neural crest migration. Interestingly, ADAM13 is itself subject to cleavage by  $\gamma$ -secretase thereby releasing a cytoplasmic domain that translocates to the nucleus thereby activating genes essential for neural crest migration (Cousin et al., 2011). Knockdown of ADAM19 in *Xenopus* caused a reduction of neural and neural crest markers, perturbed migration of cranial neural crest cells and a defect in somite organization (Neuner et al., 2009). These studies increase our understanding of cell adhesion and the involvement of proteolytic ADAM-mediated activities in guiding the migration of cranial neural crest cells during frog embryogenesis (Alfandari et al., 2010). More recently, ADAM13 function was found to be required for eye development in *Xenopus tropicalis*, possibly by regulating the Wnt signaling pathway (Wei et al., 2012). Based on the analysis of a morpholino knockdown of ADAM13 in *X. tropicalis*, ADAM13 was found to cleave ephrinB ligand, affecting  $\beta$ -catenin signaling and promoting neural crest cell and eye induction (Wei et al., 2010; Wei et al., 2012).

The function of ADAMs has also been assessed in zebrafish. Monitoring fluorescently labeled blood cells and vessels in zebrafish revealed that ADAM8 triggers the onset of blood circulation (Iida et al., 2010). The detachment of blood cell precursors from vessels is triggered by local proteolysis of

**Table 2. Examples of substrates utilized by the catalytically active ADAM proteases**

| ADAM   | Typical substrate                                                                                                                                                                                                                                               | References                                                                                                                                                                                                                                                                                                                                                                                                                                                                                                                                                                                                                                            |
|--------|-----------------------------------------------------------------------------------------------------------------------------------------------------------------------------------------------------------------------------------------------------------------|-------------------------------------------------------------------------------------------------------------------------------------------------------------------------------------------------------------------------------------------------------------------------------------------------------------------------------------------------------------------------------------------------------------------------------------------------------------------------------------------------------------------------------------------------------------------------------------------------------------------------------------------------------|
| ADAM8  | CD23, CD-30-ligand, ADAM8 prodomain, APP, L-selectin, MBP                                                                                                                                                                                                       | (Schlomann et al., 2002; Fourie et al., 2003; Naus et al., 2006; Gomez-Gaviro et al., 2007)                                                                                                                                                                                                                                                                                                                                                                                                                                                                                                                                                           |
| ADAM9  | laminin, insulin-B chain, APP, collagen XVII, delta-like ligand 1, EGF, FGFR2iib, HB-EGF, IGFBP-5, ADAM10                                                                                                                                                       | (Izumi et al., 1998; Koike et al., 1999; Roghani et al., 1999; Franzke et al., 2002; Mohan et al., 2002; Asai et al., 2003; Mazzocca et al., 2005; Peduto et al., 2005; Dyczynska et al., 2007; Tousseyn et al., 2009)                                                                                                                                                                                                                                                                                                                                                                                                                                |
| ADAM10 | APP, Notch1-4, betacellulin, CD23, CD30, CD44, prion protein, collagen IV and XVII, fractalkine, delta-like ligand 1, desmoglein, E-cadherin, N-cadherin, VE-cadherin, EGF, ephrin A2 and A5, ERBB2, Fas-L, IL6R, Klotho, LAG-3, L1, MICA, Pcdh-γ C3/B4, TRANCE | (Pan and Rubin, 1997; Millichip et al., 1998; Hattori et al., 2000; Vincent et al., 2001; Franzke et al., 2002; Hundhausen et al., 2003; Matthews et al., 2003; Six et al., 2003; Nagano et al., 2004; Postina et al., 2004; Sahin et al., 2004; Janes et al., 2005; Maretzky et al., 2005a; Maretzky et al., 2005b; Reiss et al., 2005; Bech-Serra et al., 2006; Hikita et al., 2006; Liu et al., 2006; Reiss et al., 2006; Weskamp et al., 2006; Eichenauer et al., 2007; Li et al., 2007; Schulte et al., 2007; Schulz et al., 2008; Waldhauer et al., 2008; Bloch et al., 2009; Jorissen et al., 2010; Kuhn et al., 2010; Altmepfen et al., 2011) |
| ADAM12 | collagen IV, delta-like ligand 1, HB-EGF, fibronectin, gelatin, IGFBP-3/-5                                                                                                                                                                                      | (Loechel et al., 2000; Asakura et al., 2002; Roy et al., 2004; Dyczynska et al., 2007)                                                                                                                                                                                                                                                                                                                                                                                                                                                                                                                                                                |
| ADAM15 | amphiregulin, CD23, E-cadherin, HB-EGF, collagen IV, ADAM10                                                                                                                                                                                                     | (Martin et al., 2002; Fourie et al., 2003; Schafer et al., 2004; Hart et al., 2005; Najj et al., 2008; Tousseyn et al., 2009)                                                                                                                                                                                                                                                                                                                                                                                                                                                                                                                         |
| ADAM17 | ACE2, amphiregulin, APP, CD30, CD40, CD44, collagen XVII, delta-like ligand 1, desmoglein, epigen, epiregulin, HB-EGF, ICAM-1, IL1R, IL6R, L1, LAG-3, L-selectin, Nectin 4, Neuregulin 1, Notch-1, TGFα, TNFα, TNF receptor I and II, VCAM-1                    | (Black et al., 1997; Moss et al., 1997; Buxbaum et al., 1998; Peschon et al., 1998; Brou et al., 2000; Hansen et al., 2000; Reddy et al., 2000; Franzke et al., 2002; Contin et al., 2003; Garton et al., 2003; Nagano et al., 2004; Sahin et al., 2004; Fabre-Lafay et al., 2005; Horiuchi et al., 2005; Lambert et al., 2005; Maretzky et al., 2005b; Bech-Serra et al., 2006; Tsakadze et al., 2006; Chalaris et al., 2007; Dyczynska et al., 2007; Li et al., 2007; Sahin and Blobel, 2007)                                                                                                                                                       |
| ADAM19 | neuregulin, TRANCE, TNFα, ADAM19                                                                                                                                                                                                                                | (Shirakabe et al., 2001; Kang et al., 2002; Chesneau et al., 2003; Zheng et al., 2004)                                                                                                                                                                                                                                                                                                                                                                                                                                                                                                                                                                |
| ADAM28 | CD23, IGFBP-3, myelin basic protein, connective tissue growth factor                                                                                                                                                                                            | (Howard et al., 2001; Fourie et al., 2003; Mochizuki et al., 2004; Mochizuki et al., 2010)                                                                                                                                                                                                                                                                                                                                                                                                                                                                                                                                                            |
| ADAM33 | CD23, Kit ligand-1                                                                                                                                                                                                                                              | (Zou et al., 2005; Meng et al., 2007)                                                                                                                                                                                                                                                                                                                                                                                                                                                                                                                                                                                                                 |

adhesion molecules. Antisense morpholino-mediated knockdown of Adam8 revealed a dramatic failure in blood circulation, which was shown to be a cell autonomous effect in primitive blood cells. The same study also suggested that ADAM8-mediated cleavage of the cell adhesion molecule P-selectin glycoprotein 1 is involved in the early regulation of the onset of blood circulation (Iida et al., 2010).

In one of the few studies in invertebrate models of a non-proteolytic ADAM mutant, it was reported that worms carrying mutations in the disintegrin domain of UNC-71 (ADAM14) display abnormalities in axon guidance, axon fasciculation and sex myoblast migration (Huang et al., 2003). This finding, together with studies in vertebrates, suggests that the non-proteolytic ADAMs act mainly as regulators of cell adhesion in the central nervous system.

### Functions of ADAMs in mice: roles in angiogenesis, neurogenesis, skin, lung and heart development

In order to study further the developmental functions of ADAM metalloproteases in vertebrates, ADAM loss- and gain-of-function mouse models were developed and have proven to be versatile tools. Constitutive deletion of the sperm-egg fusion relevant ADAMs 1, 2 and 3 led to male infertility. However, all other ADAMs that are widely expressed in the mouse (e.g. 8, 9, 10, 11, 12, 15, 17, 19, 22, 23, 33) could be comprehensively studied using either knockout or overexpression mouse models. Whereas

ADAM11, 22 and 23 might function as adhesion molecules, the remaining ADAMs were shown to be catalytically active, exerting their functions mainly by ectodomain shedding. In line with their widespread expression patterns in murine tissues, the observed phenotypes of ADAM knockout mice are diverse. Table 3 provides an overview of the studies on the respective mouse models and their conclusions regarding the *in vivo* functions of these proteases. Interestingly, the phenotype of the knockout mice suggested that only ADAM10, 17 and 19 are essential for mouse development. Whereas ADAM19 seems to exert its most important function in cells of the peripheral nervous system and during development of the heart by the processing of type I neuregulins (NRGIs) (Kurohara et al., 2004), the consequences of deleting ADAM10 and ADAM17 are more severe, leading to abnormalities in almost all tissues. Notably, several ADAMs play important roles in pathological situations, such as inflammation, carcinogenesis or stress-mediated angiogenic response, as revealed by various disease models (Table 3; Box 1).

In the following section, we focus on the well-characterized roles of the two most intensively studied family members, ADAM10 and ADAM17, and their contribution in developmental processes, tissue organization and function, and signal transduction. We also briefly discuss the roles of two other well-studied ADAMs: ADAM19, which is implicated in, amongst other processes, heart development and remyelination processes in the peripheral nervous system; and ADAM33, which is implicated in airway inflammation.



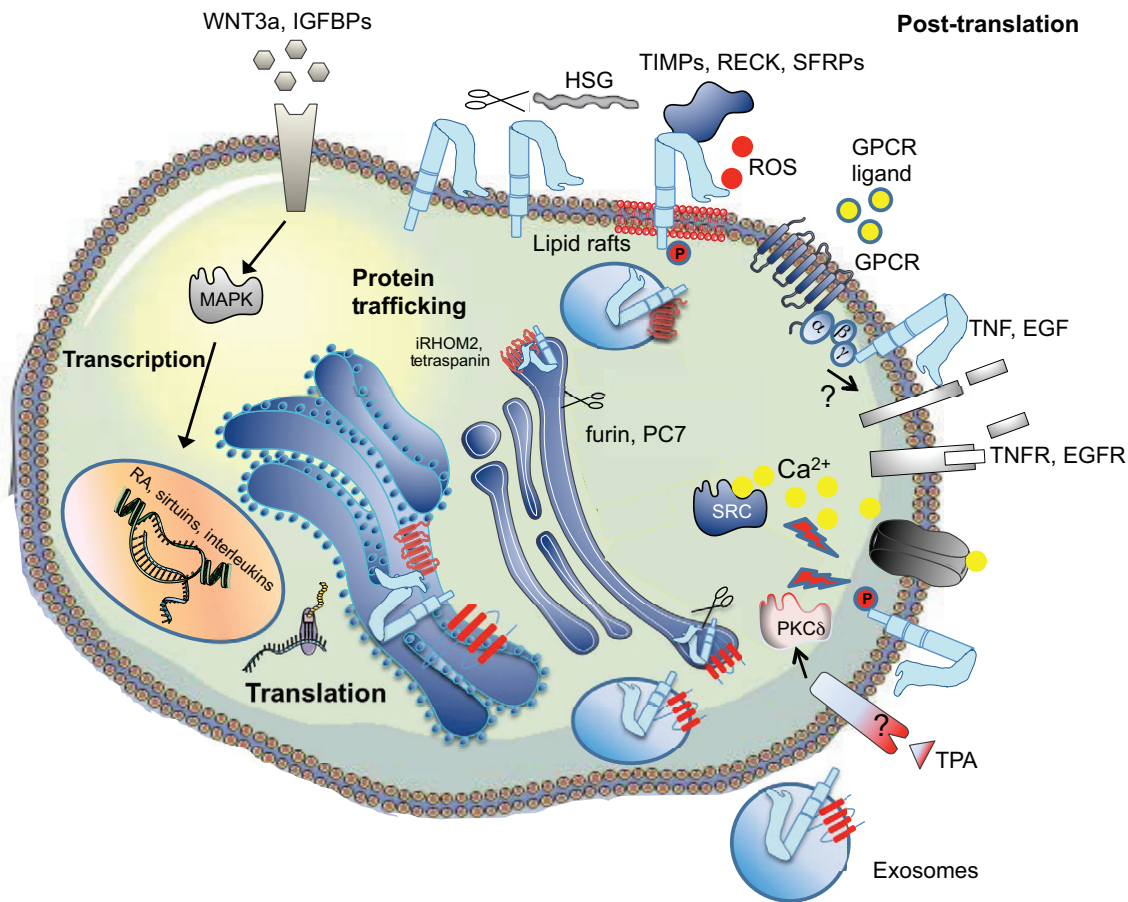

**Fig. 4. The regulation of proteolytic active ADAMs.** ADAMs (pale blue) can be regulated at the level of transcription, translation and through different post-translational processes. For example, transcription of ADAMs can be modulated by factors such as retinoic acid (RA), sirtuins or interleukins. Protein trafficking of ADAMs can subsequently be regulated by different tetraspanins and, as recently observed, also by iRHOM2. The processing of ADAMs themselves can be controlled by furin and proprotein convertases (PCs), whereas factors such as TIMPs, RECK, HSG, ROS and GPCR ligands regulate the activity of ADAMs via direct and indirect protein-protein interactions. Furthermore, phosphorylation (P) is a common post-translational modification that can be initiated by either calcium influx and subsequent SRC kinase activation or TPA-induced PKC $\delta$  mobilization. EGF(R), epidermal growth factor (receptor); GPCR, G protein-coupled receptor; HSG, heparan sulfate glycosaminoglycans; IGFBPs, insulin growth factor-binding proteins; iRHOM2, inactivated rhomboid protein 2; MAPK, mitogen-activated protein kinase; PC7, proprotein convertase 7; PKC, protein kinase C; RECK, reversion-inducing cysteine-rich protein with Kazal motifs; ROS, reactive oxygen species; SFRPs: secreted frizzled-related proteins; TIMPs, tissue inhibitors of metalloproteases; TNF(R), tumor necrosis factor  $\alpha$  (receptor); TPA, tetradecanoyl-phorbolacetate.

#### ADAM10: the Notch sheddase

Deficiency of ADAM10 leads to prenatal lethality around embryonic day (E) 9.5. ADAM10 knockout embryos are characterized by severe growth retardation, impaired somite development, as well as defects in the developing central nervous and cardiovascular systems, all of which point to a central role for ADAM10 during embryonic development (Hartmann et al., 2002). In order to obtain information about ADAM10 function in adult mice and selected tissues, conditional and inducible ADAM10 knockout mice were generated using Cre/loxP recombination technology. Consequently, the first conditional knockout of ADAM10 was reported using the murine lymphocyte-specific protein tyrosine kinase (*Lck*)-Cre deleter strain, which was shown to be most effective within intrathymic T cells (Hennet et al., 1995). Phenotypical analysis of these mice revealed a mild block in the developmental transition from the double negative (DN) 2 to DN3 stage, leading to reduced numbers of double- and single-positive thymocytes (Tian et al., 2008). These results confirmed previous studies using transgenic

expression of a dominant-negative form of ADAM10 under the control of the same promoter (Manilay et al., 2005). A role for ADAM10 in B-cell development, involving shedding of the low-affinity IgE receptor (CD23; also known as FCER2A), has been suggested following cell-based studies using ADAM10-deficient fibroblasts (Weskamp et al., 2006), and this role was verified using B cell-specific ADAM10 knockout mice (Gibb et al., 2010). The lack of ADAM10 in B cells prevented development of the entire marginal zone B-cell lineage and led to impaired antibody production as well as a disrupted lymphoid architecture (Gibb et al., 2010; Chaimowitz et al., 2011). Interestingly, transgenic overexpression of ADAM10 in the B-cell lineage did not result in a dramatic phenotypic change in B-cell development, but led to the development of a myeloproliferative disorder, with a substantial increase in myeloid-derived suppressor cells (MDSCs), severe splenomegaly and thymic atrophy (Gibb et al., 2011). Mixed bone marrow chimeras indicated a cell-intrinsic role for ADAM10 during hematopoietic cell-fate decisions. Using an inducible (*Mx1*-Cre driven) model of ADAM10-deficiency,



**Table 3. Mouse models used to unravel the function of ADAM proteases**

| Mutated gene  | Tissue(s) with developmental phenotype                                                                                                                                                                                                                                                                                                                                                                                                                                                                                | Functional role revealed in experimental mouse models                                                                                                                                                                                                                                                                                                                                                                                                                                                                                                                                    |
|---------------|-----------------------------------------------------------------------------------------------------------------------------------------------------------------------------------------------------------------------------------------------------------------------------------------------------------------------------------------------------------------------------------------------------------------------------------------------------------------------------------------------------------------------|------------------------------------------------------------------------------------------------------------------------------------------------------------------------------------------------------------------------------------------------------------------------------------------------------------------------------------------------------------------------------------------------------------------------------------------------------------------------------------------------------------------------------------------------------------------------------------------|
| <i>Adam1</i>  | Sperm (migration defect) (Nishimura et al., 2004)                                                                                                                                                                                                                                                                                                                                                                                                                                                                     | Not reported                                                                                                                                                                                                                                                                                                                                                                                                                                                                                                                                                                             |
| <i>Adam2</i>  | Sperm, testes (Cho et al., 1998)                                                                                                                                                                                                                                                                                                                                                                                                                                                                                      | Not reported                                                                                                                                                                                                                                                                                                                                                                                                                                                                                                                                                                             |
| <i>Adam3</i>  | Sperm (Shamsadin et al., 1999)                                                                                                                                                                                                                                                                                                                                                                                                                                                                                        | Not reported                                                                                                                                                                                                                                                                                                                                                                                                                                                                                                                                                                             |
| <i>Adam8</i>  | No major abnormalities (Kelly et al., 2005), thymus (Gossens et al., 2010), bone/osteoclasts (Ishizuka et al., 2011)                                                                                                                                                                                                                                                                                                                                                                                                  | Inflammation: allergic/bronchial asthma (Naus et al., 2010; Paulissen et al., 2011), rheumatoid arthritis (Zack et al., 2009), casein-induced peritoneal leukocyte infiltration, oxazolone-induced contact hypersensitivity reactions (Higuchi et al., 2002)<br>Neurodegeneration: motorneuron disease – wobbler mouse (Bartsch et al., 2010)<br>Osteoclastogenesis: TNF $\alpha$ -induced bone remodeling (Ishizuka et al., 2011)<br>Angiogenesis: oxygen-induced retinopathy (Guaiquil et al., 2010)<br>Carcinogenesis: heterotopical injection of tumor cells (Guaiquil et al., 2010) |
| <i>Adam9</i>  | No major abnormalities (Weskamp et al., 2002), retina (age-dependent regeneration) (Parry et al., 2009)                                                                                                                                                                                                                                                                                                                                                                                                               | Angiogenesis: oxygen-induced retinopathy, laser-induced choroidal neovascularization (Guaiquil et al., 2009)<br>Skin homeostasis: wound healing (Mauch et al., 2010)<br>Carcinogenesis: transgenic mice expressing SV40 large T antigen, polyoma virus middle T antigen and a mutated adenomatosis polyposis coli gene (Peduto et al., 2005)                                                                                                                                                                                                                                             |
| <i>Adam10</i> | Cardiovascular system somites, heart, extra-embryonic tissue (Hartmann et al., 2002), central nervous system (Schmitt et al., 2006; Jorissen et al., 2010), immune system (B cells, T cells, myeloid cells and megakaryocytes) (Bender et al., 2010; Gibb et al., 2010; Gibb et al., 2011; Yoda et al., 2011), intestine (Solanas et al., 2011), vascular endothelium (Glomski et al., 2011b), epidermis/hair (Weber et al., 2011), airway epithelium (Inoshima et al., 2011)<br>NB. Classical ADAM10 KO die at ~E9.5 | Inflammation/immune response: ovalbumin-induced asthma, antigen-induced B-cell response (Chaimowitz et al., 2011; Mathews et al., 2011; Inoshima et al., 2012)<br>Skin homeostasis: wound healing (our unpublished observations)<br>Angiogenesis: oxygen-induced retinopathy (Glomski et al., 2011)<br>Neurodegeneration/Alzheimer's disease: crossing with a transgenic familial Alzheimer's disease mutation mouse line (Postina et al., 2004)                                                                                                                                         |
| <i>Adam11</i> | No major abnormalities (Takahashi et al., 2006b)                                                                                                                                                                                                                                                                                                                                                                                                                                                                      | Nociception: formalin paw test and acetic acid writhing test (Takahashi et al., 2006a)<br>Behavior: hidden water maze, rotating rod task (Takahashi et al., 2006b)                                                                                                                                                                                                                                                                                                                                                                                                                       |
| <i>Adam12</i> | No major abnormalities, skeletal muscle (regeneration) (Kurisaki et al., 2003), adipose fat tissue (Kawaguchi et al., 2002), bone (Kveiborg et al., 2006)                                                                                                                                                                                                                                                                                                                                                             | Adipogenesis: high-fat diet (Masaki et al., 2005)<br>Myogenesis: crossing with dystrophin- or laminin-deficient mice (Kronqvist et al., 2002; Guo et al., 2005)<br>Carcinogenesis: PyMT Model (Kveiborg et al., 2005)<br>Neuroinflammation: cuprizone demyelination model (Baertling et al., 2010)<br>Skin homeostasis: wound healing (Harsha et al., 2008)                                                                                                                                                                                                                              |
| <i>Adam15</i> | No major abnormalities (Horiuchi et al., 2003), bone (age-dependent cartilage remodeling) (Bohm et al., 2005; Marzia et al., 2011)                                                                                                                                                                                                                                                                                                                                                                                    | Angiogenesis: retinopathy of prematurity, oxygen-induced ischemic retinopathy, laser-induced choroidal neovascularization (Horiuchi et al., 2003; Xie et al., 2008)<br>Carcinogenesis: subcutaneous injection of B16F10 melanoma cells (Horiuchi et al., 2003)<br>Apoptosis: DNA damaging by camptothecin (Bohm et al., 2010)                                                                                                                                                                                                                                                            |
| <i>Adam17</i> | Heart, lung, skin/hair, eye, peripheral nervous system, immune system, gastrointestinal tract (energy metabolism) (Peschon et al., 1998; Jackson et al., 2003)<br>NB. Most classical ADAM17 KO mice die perinatally (dependent on genetic background)                                                                                                                                                                                                                                                                 | Inflammation: DSS-induced colitis (Chalaris et al., 2010), LPS-induced sepsis (Horiuchi et al., 2007), drug/antibody-induced hepatitis (Murthy et al., 2010)                                                                                                                                                                                                                                                                                                                                                                                                                             |
| <i>Adam19</i> | Heart (Kurohara et al., 2004; Zhou et al., 2004), (moto)neurons (Yumoto et al., 2008)                                                                                                                                                                                                                                                                                                                                                                                                                                 | Neurogenesis: sciatic nerve crush (Wakatsuki et al., 2009)                                                                                                                                                                                                                                                                                                                                                                                                                                                                                                                               |
| <i>Adam22</i> | Peripheral nervous system (Sagane et al., 2005)<br>NB. Classical KO die around weaning                                                                                                                                                                                                                                                                                                                                                                                                                                | Not reported                                                                                                                                                                                                                                                                                                                                                                                                                                                                                                                                                                             |
| <i>Adam23</i> | Not reported<br>NB. Classical KO die at ~P14 (Mitchell et al., 2001)                                                                                                                                                                                                                                                                                                                                                                                                                                                  | Not reported                                                                                                                                                                                                                                                                                                                                                                                                                                                                                                                                                                             |
| <i>Adam33</i> | Not reported                                                                                                                                                                                                                                                                                                                                                                                                                                                                                                          | Inflammation: allergen-induced asthma (Chen et al., 2006)                                                                                                                                                                                                                                                                                                                                                                                                                                                                                                                                |

DSS, dextran sulfate sodium; LPS, lipopolysaccharide; PyMT, mouse mammary tumor virus promoter polyoma middle T-antigen.

Yoda et al. provided evidence to show that ADAM10-dependent myeloproliferative disorders can be initiated by granulocyte colony stimulating factor (G-CSF)-driven and non-cell-autonomous mechanisms (Yoda et al., 2011). In further studies, these mice were used to show that ADAM10 is a key regulator of

Notch/RBPJ signaling during inflammatory macrophage polarization via the transcription factor IRF8 (Xu et al., 2012).

Embryonic development and adult homeostasis of the epidermis were also shown to be strictly dependent on ADAM10 expression (Weber et al., 2011). Whereas ADAM10 deficiency during

epidermal development led to accelerated terminal differentiation of keratinocytes, resulting in a severe and perinatal lethal barrier defect, ADAM10 deficiency in adult epidermis provoked disturbed epidermal homeostasis marked by hyperproliferation of basal keratinocytes, alopecia, hyperkeratinization, thymic atrophy and upregulation of the cytokine thymic stromal lymphopoietin (TSLP) (Weber et al., 2011). ADAM10 also plays a role during development and homeostasis of self-renewing epithelium in the intestine; conditional overexpression of a dominant-negative form of ADAM10 in the intestine revealed a role for ADAM10 in the compartmentalization of cells in epithelial tissues as well as in adhesion and polarity of migrating cells within such a complex tissue (Solanas et al., 2011). Furthermore, the development of endothelium depends on ADAM10 expression. As shown by Glomski and co-workers (Glomski et al., 2011), inactivation of this protease in endothelial cells using the endothelial-specific *Tie2-Cre* deleter strain (Kisanuki et al., 2001) leads to increased branching and density of the retinal vasculature, aberrant subcapsular hepatic veins, enlarged glomeruli and intestinal polyps, abnormal endochondral ossification with stunted long bone growth and increased pathological neovascularization following oxygen-induced retinopathy. These findings underline the role of ADAM10 as a central regulator of endothelial cell-fate decisions.

The determination of early cell-fate decisions is also one of the predominant roles of ADAM10 in the central nervous system. ADAM10-specific functions in brain were analyzed using a nestin-Cre driven conditional knockout, which inactivates the metalloprotease in neuronal progenitor cells that can differentiate to neurons and glia (Jorissen et al., 2010). The conditional knockout mice die perinatally with a disrupted neocortex and a severely reduced ganglionic eminence, which possibly arose by precocious neuronal differentiation resulting in early depletion of progenitor cells. Importantly, in the same study, ADAM10 was identified as the *in vivo*  $\alpha$ -secretase responsible for cleaving APP, which plays a decisive role in the development of Alzheimer's disease. Interestingly, the cellular prion protein (PrP<sup>c</sup>), which after misfolding can lead to transmissible spongiform encephalopathies, is also a substrate of ADAM10. In the brain of conditional ADAM10 knockout mice PrP<sup>c</sup> accumulates in the early secretory pathway. This led to the conclusion that shedding by ADAM10 is a mechanism for regulating the levels of PrP<sup>c</sup> at the plasma membrane (Altmppen et al., 2011).

Taking all the aforementioned developmental phenotypes of the different ADAM10 knockout mouse models into account, the similarity with mice showing a disturbed Notch signaling pathway is obvious (Roca and Adams, 2007; Watt et al., 2008; Pierfelice et al., 2011) (Fig. 3). Ectodomain shedding activity of Notch1 by ADAM10 could be directly demonstrated (Jorissen et al., 2010; Weber et al., 2011), which is also in line with the observed *in vivo* function of the *Drosophila* ADAM10 ortholog Kuzbanian (Rooke et al., 1996; Pan and Rubin, 1997). However, cell-based experiments have revealed that other substrates of ADAM10 might also contribute to the phenotypes observed in the ADAM10 knockout mice. These substrates include E-cadherin (Inoshima et al., 2011; Maretzky et al., 2005a), CD23 (Weskamp et al., 2006), Fas ligand (Schulte et al., 2007) and ephrin (Janes et al., 2005). Notably, however, the Notch signaling pathway is upstream of all other signaling complexes identified so far and it therefore seems highly likely that disturbed Notch signaling preferentially contributes to the observed developmental defects. Furthermore, the major functional shedding targets of ADAM10 in post-mitotic

tissues might be different from Notch and further studies are required to elucidate the functional role of ADAM10 in these tissues.

Independent of all findings discussed in this section, the question of whether ADAM10 may be used as a therapeutic target has not yet been directly addressed. A promising perspective for such a treatment was reported in studies analyzing ADAM10-deficient mouse models during inflammatory processes, such as asthma or *Staphylococcus aureus* infection in normal or wounded skin (Mathews et al., 2011; Inoshima et al., 2012), as well as in stress-induced neovascularization processes in the retina (Glomski et al., 2011). However, prolonged ADAM10 deficiency or activation in developing or self-renewing tissues was shown to have deleterious effects (Weber et al., 2011; Gibb et al., 2011), and it will be essential to monitor carefully the recipients of drugs that modulate ADAM10 activity.

### ADAM17: the regulated sheddase

As early as 1998, it was reported that mice with a complete deficiency of ADAM17 display multiple pathological alterations, including disturbed development of eyes, epithelial tissue, lung, heart, immune system, hair and skin (Peschon et al., 1998). Depending on the genetic background, ADAM17-deficient mice die between E17.5 and birth or stay viable until adulthood. The surviving mice exhibit a severe wasting syndrome, leading to an increased rate of mortality (Gelling et al., 2008). Extensive histological analysis revealed that eyelids did not fuse, and eyes lacked a conjunctival sac and had attenuated corneas (Peschon et al., 1998), possibly caused by an impaired epithelial organization. Similarly, epithelial dysgenesis led to decreased lung branching processes and disturbed heart valvulogenesis associated with increased heart size, myocardial trabeculation, mitral valve defects, reduced cell compaction and hypertrophy of cardiomyocytes (Zhao et al., 2001; Shi et al., 2003). ADAM17 expression was also shown to possess regulatory functions during neurogenesis, as the loss of neuronal ADAM17 activity led to hypermyelination possibly caused by defective processing of neuregulin-1 type III (La Marca et al., 2011).

The described ADAM17-deficient mouse phenotypes displayed a striking similarity to EGFR-signaling defective mouse mutants. Most of the developmental defects could be explained by decreased levels of EGFR ligands, such as transforming growth factor  $\alpha$  (TGF $\alpha$ ), heparin-binding EGF (HBEGF) or amphiregulin, and subsequent inadequate EGFR activation (Zhao et al., 2001; Jackson et al., 2003; Chalaris et al., 2010). This signaling process was therefore termed EGFR transactivation (Prenzel et al., 1999). Despite the wealth of data obtained from the ADAM17 loss-of-function mutants, the generation of conditional ADAM17 mutants was necessary to learn more about the role of ADAM17 during tissue homeostasis and regeneration. As ADAM17 was originally identified as the TNF $\alpha$  cleavage enzyme (TACE), it was of great interest to delete ADAM17 specifically in cells of the immune system. ADAM17-deficient leukocytes were able to drastically reduce the mortality rate following lipopolysaccharide (LPS) and *Escherichia coli*-induced sepsis (Horiuchi et al., 2007; Long et al., 2010), underlining the importance of ADAM17 as the *in vivo* sheddase for TNF $\alpha$ . In ADAM17 radiation chimeric mice, the migration and rolling of activated leukocytes was impaired by severely reduced shedding of L-selectin (Wang et al., 2010). Although ADAM17 deficiency in immune cells did not impair hematopoiesis, conditional knockout of ADAM17 in stroma cells and also in epidermal cells

led to hematopoietic disorders (Wang et al., 2010; Murthy et al., 2012), which is surprisingly similar to the defects observed in ADAM10-deficient mouse models (Weber et al., 2011; Yoda et al., 2011). Although in most cases ADAM10-deficient mice phenocopy Notch signaling-deficient mice (Weber et al., 2011; Glomski et al., 2011), and ADAM17 knockout mice resemble EGFR or EGFR-ligand knockout mice (Franzke et al., 2012), there might be pathological situations under which both ADAM10 and ADAM17 share substrates in common signaling pathways, as indicated by previous cell-based experiments (Sahin et al., 2004; Bozkulak and Weinmaster, 2009). ADAM17 might also be involved in pathological neovascularization, implicating another functional importance of this protease in epithelial and endothelial maturation (Weskamp et al., 2010).

Recently, a spontaneous recessive mutation in the waved with open eyes (woe) locus was identified, and it was shown that this mutation leads to deletion of murine exon 7 of ADAM17 (Hassemer et al., 2010). In these hypomorphs, the residual ADAM17 activity allows these mice to thrive into adulthood. Similarly, Chalaris and co-workers (Chalaris et al., 2010) were able to generate a hypomorphic mouse model by introduction of an artificial exon with an in-frame translational stop codon between exons 11 and 12. These mice proved to be an excellent tool for examination of inflammation and regeneration. The observation of increased gut inflammation characterized by TGF $\alpha$ -mediated hyperplasia after chronically dextran sulfate sodium (DSS)-induced colitis provided evidence that ADAM17 also exerts a positive effect on regeneration processes after tissue damage, mainly by activation of the EGFR signal transducer and activator of transcription 3 (STAT3) signaling axis.

The studies mentioned above provided multiple lines of evidence for a role of ADAM17 during the *in vivo* regulation of pro- and anti-inflammatory molecules such as TNF $\alpha$  or TGF $\alpha$ . Following this, the therapeutic modulation of ADAM17 activity is considered to be a favorable target for the treatment of acutely or chronically inflamed tissues. However, therapeutic targeting has to be tightly controlled, as shown by a recent report of a young patient who carried an ADAM17 null mutation suffering from repeated skin and intestinal inflammation in specific tissues or developmental stages (Blaydon et al., 2011).

### **ADAM19: a regulator of the neuro-cardiovascular signaling axis**

Whereas ADAM10 and ADAM17-deficient mice displayed developmental defects in multiple tissues, ADAM19 exerts its most important function predominantly in cells of the cardiovascular and neuronal systems. Different studies showed that the majority of ADAM19-deficient mice die perinatally, probably owing to cardiac defects (Kurohara et al., 2004; Zhou et al., 2004). These include ventricular septum defects and abnormal formation of heart valves leading to valvular stenosis and abnormalities of the cardiovascular system. It was reported that ADAM19 plays an important role during embryonic development of the endocardial cushion, probably by mediating ectodomain shedding of neuregulin  $\beta$ 1 (Kurohara et al., 2004). ADAM19 is expressed in epithelial and mesenchymal cells originating from the neural crest, and studies with cell type-specific, ADAM19-overexpressing mice revealed that ADAM19 expression in neural crest cells is solely crucial for proper heart formation (Komatsu et al., 2007). Additionally, ADAM19 is also capable of cleaving HBEGF (Horiuchi et al., 2005), which is likewise important for cardiac developmental processes (Iwamoto and Mekada, 2006).

The functional implication of ADAM19 was demonstrated by phenotypical analysis of neuromuscular junctions (NMJs) in muscles of ADAM19-deficient mice (Yumoto et al., 2008). ADAM19 participated in the formation of NMJs by stabilizing the postsynaptic ephrin-A5–EphA4 complex, which is in turn important for mediating contact-dependent repulsion and thus neurite outgrowth. In a model of sciatic nerve regeneration, ADAM19 was furthermore shown to contribute to remyelination processes in Schwann cells via regulation of the expression of the transcription factor KROX20 (also known as EGR2) (Wakatsuki et al., 2009).

### **ADAM33: an asthma-causing sheddase?**

ADAM33 is a widely expressed member of the ADAMs family (Gunn et al., 2002) that gained increasing recognition following the publication of a genome-wide association study that linked ADAM33 with asthma and bronchial hyper-reactivity (Van Eerdewegh et al., 2002). This study was the first report of a potentially disease-causing mutation within ADAM family members, and many groups tried to reconcile these findings with additional genetic studies in human and mouse. However, genetic studies in human patients led to contradictory results (Raby et al., 2004; Blakey et al., 2009; Jie et al., 2011; Miyake et al., 2012) and ADAM33-deficient mice did not display phenotypical differences when assessed in established models of airway inflammation (Chen et al., 2006). Nevertheless, cell-based studies revealed a putative role for ADAM33 as an ectodomain sheddase for the IgE receptor CD23, which is a key player during allergic reactions (Weskamp et al., 2006; Meng et al., 2007). Transgenic ADAM33 mice might be useful for solving this question in the future.

### **Conclusions**

Despite considerable advances in our understanding of how ADAM proteases might control central developmental processes, we still urgently need to address a number of unresolved questions. It still remains largely unclear how different physiological regulators of ADAM activity modulate their activity and contribute to developmental decisions and tissue homeostasis. What is the spectrum of substrates used by a specific ADAM under a given physiological or developmental condition? We also do not fully understand how this ADAM substrate fingerprint and the coordinated activity of other proteases (protease network) (Overall and Blobel, 2007) are affected when environmental conditions or experimental conditions are changing. Can suitable modulators of ADAM activity be specifically designed to affect ADAM functions *in vitro* and *in vivo*? What regulates the time frame during which a specific ADAM can be active on a given substrate? Is there a relationship between the evolutionarily conserved role of ADAMs as cell-cell adhesion proteins and the more recently discovered role of ADAMs as proteases? Finally, what are the implications of genetic polymorphisms or mutations of ADAMs on human disease? Newly developed experimental tools, animal models and new technologies will certainly pave the way towards a better understanding of ADAM biology and will also open new avenues for influencing the proteolytic activities of these fascinating enzymes for therapeutic purposes.

### **Acknowledgements**

We are grateful to Dr Lee Shaw for critical reading and editing of our manuscript.



## Funding

This work was supported by the Deutsche Forschungsgemeinschaft Sonderforschungsbereich 877.

## Competing interests statement

The authors declare no competing financial interests.

## References

- Adrain, C., Zettl, M., Christova, Y., Taylor, N. and Freeman, M. (2012). Tumor necrosis factor signaling requires iRhom2 to promote trafficking and activation of TACE. *Science* **335**, 225-228.
- Albrecht, S., Wang, S., Holz, A., Bergter, A. and Paululat, A. (2006). The ADAM metalloprotease Kuzbanian is crucial for proper heart formation in *Drosophila melanogaster*. *Mech. Dev.* **123**, 372-387.
- Alfandari, D., Wolfsberg, T. G., White, J. M. and DeSimone, D. W. (1997). ADAM 13, a novel ADAM expressed in somitic mesoderm and neural crest cells during *Xenopus laevis* development. *Dev. Biol.* **182**, 314-330.
- Alfandari, D., McCusker, C. and Cousin, H. (2009). ADAM function in embryogenesis. *Semin. Cell Dev. Biol.* **20**, 153-163.
- Alfandari, D., Cousin, H. and Marsden, M. (2010). Mechanism of *Xenopus* cranial neural crest cell migration. *Cell Adh. Migr.* **4**, 553-560.
- Altmeppen, H. C., Prox, J., Puig, B., Kluth, M. A., Bernreuther, C., Thurm, D., Jorissen, E., Petrowitz, B., Bartsch, U., De Strooper, B. et al. (2011). Lack of a-disintegrin-and-metalloproteinase ADAM10 leads to intracellular accumulation and loss of shedding of the cellular prion protein in vivo. *Mol. Neurodegener.* **6**, 36.
- Andersson, E. R., Sandberg, R. and Lendahl, U. (2011). Notch signaling: simplicity in design, versatility in function. *Development* **138**, 3593-3612.
- Angerer, L., Hussain, S., Wei, Z. and Livingston, B. T. (2006). Sea urchin metalloproteases: a genomic survey of the BMP-1/tolloid-like, MMP and ADAM families. *Dev. Biol.* **300**, 267-281.
- Asai, M., Hattori, C., Szabo, B., Sasagawa, N., Maruyama, K., Tanuma, S. and Ishiura, S. (2003). Putative function of ADAM9, ADAM10, and ADAM17 as APP alpha-secretase. *Biochem. Biophys. Res. Commun.* **301**, 231-235.
- Asakura, M., Kitakaze, M., Takashima, S., Liao, Y., Ishikura, F., Yoshinaka, T., Ohmoto, H., Node, K., Yoshino, K., Ishiguro, H. et al. (2002). Cardiac hypertrophy is inhibited by antagonism of ADAM12 processing of HB-EGF: metalloproteinase inhibitors as a new therapy. *Nat. Med.* **8**, 35-40.
- Baertling, F., Kokozidou, M., Pufe, T., Clarner, T., Windoffer, R., Wruck, C. J., Brandenburg, L. O., Beyer, C. and Kipp, M. (2010). ADAM12 is expressed by astrocytes during experimental demyelination. *Brain Res.* **1326**, 1-14.
- Bartsch, J. W., Wildeboer, D., Koller, G., Naus, S., Rittger, A., Moss, M. L., Minai, Y. and Jockusch, H. (2010). Tumor necrosis factor-alpha (TNF-alpha) regulates shedding of TNF-alpha receptor 1 by the metalloprotease-disintegrin ADAM8: evidence for a protease-regulated feedback loop in neuroprotection. *J. Neurosci.* **30**, 12210-12218.
- Bech-Serra, J. J., Santiago-Josefat, B., Esselens, C., Saftig, P., Baselga, J., Arribas, J. and Canals, F. (2006). Proteomic identification of desmoglein 2 and activated leukocyte cell adhesion molecule as substrates of ADAM17 and ADAM10 by difference gel electrophoresis. *Mol. Cell. Biol.* **26**, 5086-5095.
- Becherer, J. D. and Blobel, C. P. (2003). Biochemical properties and functions of membrane-anchored metalloprotease-disintegrin proteins (ADAMs). *Curr. Top. Dev. Biol.* **54**, 101-123.
- Bender, M., Hofmann, S., Stegner, D., Chalaris, A., Bosl, M., Braun, A., Scheller, J., Rose-John, S. and Nieswandt, B. (2010). Differentially regulated GPVI ectodomain shedding by multiple platelet-expressed proteinases. *Blood* **116**, 3347-3355.
- Black, R. A., Rauch, C. T., Kozlosky, C. J., Peschon, J. J., Slack, J. L., Wolfson, M. F., Castner, B. J., Stocking, K. L., Reddy, P., Srinivasan, S. et al. (1997). A metalloproteinase disintegrin that releases tumour-necrosis factor-alpha from cells. *Nature* **385**, 729-733.
- Blakey, J. D., Sayers, I., Ring, S. M., Strachan, D. P. and Hall, I. P. (2009). Positionally cloned asthma susceptibility gene polymorphisms and disease risk in the British 1958 Birth Cohort. *Thorax* **64**, 381-387.
- Blaydon, D. C., Biancheri, P., Di, W.-L., Plagnol, V., Cabral, R. M., Brooke, M. A., van Heel, D. A., Ruschendorf, F., Toynbee, M., Walne, A. et al. (2011). Inflammatory skin and bowel disease linked to ADAM17 deletion. *N. Engl. J. Med.* **365**, 1502-1508.
- Blaydon, D. C., Etheridge, S. L., Risk, J. M., Hennies, H. C., Gay, L. J., Carroll, R., Plagnol, V., McDonald, F. E., Stevens, H. P., Spurr, N. K. et al. (2012). RHBDL2 mutations are associated with tylosis, a familial esophageal cancer syndrome. *Am. J. Hum. Genet.* **90**, 340-346.
- Blobel, C. P. (2005). ADAMs: key components in EGFR signalling and development. *Nat. Rev. Mol. Cell Biol.* **6**, 32-43.
- Blobel, C. P., Wolfsberg, T. G., Turck, C. W., Myles, D. G., Primakoff, P. and White, J. M. (1992). A potential fusion peptide and an integrin ligand domain in a protein active in sperm-egg fusion. *Nature* **356**, 248-252.
- Bloch, L., Sineschekova, O., Reichenbach, D., Reiss, K., Saftig, P., Kuro-o, M. and Kaether, C. (2009). Klotho is a substrate for alpha-, beta- and gamma-secretase. *FEBS Lett.* **583**, 3221-3224.
- Bode, W., Gomis-Rüth, F. X. and Stöckler, W. (1993). Astacins, serrasins, snake venom and matrix metalloproteinases exhibit identical zinc-binding environments (HEXXHXXGXXH and Met-turn) and topologies and should be grouped into a common family, the 'metzincins'. *FEBS Lett.* **331**, 134-140.
- Bohm, B., Hess, S., Krause, K., Schirner, A., Ewald, W., Aigner, T. and Burkhardt, H. (2010). ADAM15 exerts an antiapoptotic effect on osteoarthritic chondrocytes via up-regulation of the X-linked inhibitor of apoptosis. *Arthritis Rheum.* **62**, 1372-1382.
- Bohm, B. B., Aigner, T., Roy, B., Brodie, T. A., Blobel, C. P. and Burkhardt, H. (2005). Homeostatic effects of the metalloproteinase disintegrin ADAM15 in degenerative cartilage remodeling. *Arthritis Rheum.* **52**, 1100-1109.
- Bozkulak, E. C. and Weinmaster, G. (2009). Selective use of ADAM10 and ADAM17 in activation of Notch1 signaling. *Mol. Cell. Biol.* **29**, 5679-5695.
- Brou, C., Logeat, F., Gupta, N., Bessia, C., LeBail, O., Doedens, J. R., Cumano, A., Roux, P., Black, R. A. and Israel, A. (2000). A novel proteolytic cleavage involved in Notch signaling: the role of the disintegrin-metalloprotease TACE. *Mol. Cell* **5**, 207-216.
- Buxbaum, J. D., Liu, K. N., Luo, Y., Slack, J. L., Stocking, K. L., Peschon, J. J., Johnson, R. S., Castner, B. J., Cerretti, D. P. and Black, R. A. (1998). Evidence that tumor necrosis factor alpha converting enzyme is involved in regulated alpha-secretase cleavage of the Alzheimer amyloid protein precursor. *J. Biol. Chem.* **273**, 27765-27767.
- Cao, Y., Kang, Q., Zhao, Z. and Zolkiewska, A. (2002). Intracellular processing of metalloprotease disintegrin ADAM12. *J. Biol. Chem.* **277**, 26403-26411.
- Chaimowitz, N. S., Martin, R. K., Cichy, J., Gibb, D. R., Patil, P., Kang, D. J., Farnsworth, J., Butcher, E. C., McCright, B. and Conrad, D. H. (2011). A disintegrin and metalloproteinase 10 regulates antibody production and maintenance of lymphoid architecture. *J. Immunol.* **187**, 5114-5122.
- Chalaris, A., Rabe, B., Paliga, K., Lange, H., Laskay, T., Fielding, C. A., Jones, S. A., Rose-John, S. and Scheller, J. (2007). Apoptosis is a natural stimulus of IL6R shedding and contributes to the proinflammatory trans-signaling function of neutrophils. *Blood* **110**, 1748-1755.
- Chalaris, A., Adam, N., Sina, C., Rosenstiel, P., Lehmann-Koch, J., Schirmacher, P., Hartmann, D., Cichy, J., Gavrilova, O., Schreiber, S. et al. (2010). Critical role of the disintegrin metalloprotease ADAM17 for intestinal inflammation and regeneration in mice. *J. Exp. Med.* **207**, 1617-1624.
- Chen, C., Huang, X. and Sheppard, D. (2006). ADAM33 is not essential for growth and development and does not modulate allergic asthma in mice. *Mol. Cell. Biol.* **26**, 6950-6956.
- Chesneau, V., Becherer, J. D., Zheng, Y., Erdjument-Bromage, H., Tempst, P. and Blobel, C. P. (2003). Catalytic properties of ADAM19. *J. Biol. Chem.* **278**, 22331-22340.
- Cho, C., Bunch, D. O., Faure, J. E., Goulding, E. H., Eddy, E. M., Primakoff, P. and Myles, D. G. (1998). Fertilization defects in sperm from mice lacking fertilin beta. *Science* **281**, 1857-1859.
- Contin, C., Pitard, V., Itai, T., Nagata, S., Moreau, J. F. and Dechanet-Merville, J. (2003). Membrane-anchored CD40 is processed by the tumor necrosis factor-alpha-converting enzyme. Implications for CD40 signaling. *J. Biol. Chem.* **278**, 32801-32809.
- Cousin, H., Abbruzzese, G., Kerdavid, E., Gaultier, A. and Alfandari, D. (2011). Translocation of the cytoplasmic domain of ADAM13 to the nucleus is essential for Calpain8-a expression and cranial neural crest cell migration. *Dev. Cell* **20**, 256-263.
- De Strooper, B. and Annaert, W. (2010). Novel research horizons for presenilins and gamma-secretases in cell biology and disease. *Annu. Rev. Cell Dev. Biol.* **26**, 235-260.
- Diaz-Rodriguez, E., Montero, J. C., Esparis-Ogando, A., Yuste, L. and Pandiella, A. (2002). Extracellular signal-regulated kinase phosphorylates tumor necrosis factor alpha-converting enzyme at threonine 735, a potential role in regulated shedding. *Mol. Biol. Cell* **13**, 2031-2044.
- Duffy, M. J., McKiernan, E., O'Donovan, N. and McGowan, P. M. (2009a). Role of ADAMs in cancer formation and progression. *Clin. Cancer Res.* **15**, 1140-1144.
- Duffy, M. J., McKiernan, E., O'Donovan, N. and McGowan, P. M. (2009b). The role of ADAMs in disease pathophysiology. *Clin. Chim. Acta* **403**, 31-36.
- Dyczynska, E., Sun, D., Yi, H., Sehara-Fujisawa, A., Blobel, C. P. and Zolkiewska, A. (2007). Proteolytic processing of delta-like 1 by ADAM proteases. *J. Biol. Chem.* **282**, 436-444.
- Edwards, D. R., Handsley, M. M. and Pennington, C. J. (2008). The ADAM metalloproteinases. *Mol. Aspects Med.* **29**, 258-289.
- Eichenauer, D. A., Simhadri, V. L., von Strandmann, E. P., Ludwig, A., Matthews, V., Reiners, K. S., von Tresckow, B., Saftig, P., Rose-John, S., Engert, A. et al. (2007). ADAM10 inhibition of human CD30 shedding increases specificity of targeted immunotherapy in vitro. *Cancer Res.* **67**, 332-338.
- Endres, K. and Fahrenholz, F. (2010). Upregulation of the alpha-secretase ADAM10 – risk or reason for hope? *FEBS J.* **277**, 1585-1596.



- Fabre-Lafay, S., Garrido-Urbani, S., Reymond, N., Goncalves, A., Dubreuil, P. and Lopez, M. (2005). Nectin-4, a new serological breast cancer marker, is a substrate for tumor necrosis factor-alpha-converting enzyme (TACE)/ADAM-17. *J. Biol. Chem.* **280**, 19543-19550.
- Fambrough, D., Pan, D., Rubin, G. M. and Goodman, C. S. (1996). The cell surface metalloprotease/disintegrin Kuzbanian is required for axonal extension in *Drosophila*. *Proc. Natl. Acad. Sci. USA* **93**, 13233-13238.
- Fluhrer, R. and Haass, C. (2007). Signal peptide peptidases and gamma-secretase: cousins of the same protease family? *Neurodegener. Dis.* **4**, 112-116.
- Fluhrer, R., Steiner, H. and Haass, C. (2009). Intramembrane proteolysis by signal peptide peptidases: a comparative discussion of GXGD-type aspartyl proteases. *J. Biol. Chem.* **284**, 13975-13979.
- Fourie, A. M., Coles, F., Moreno, V. and Karlsson, L. (2003). Catalytic activity of ADAM8, ADAM15, and MDC-1 (ADAM28) on synthetic peptide substrates and in ectodomain cleavage of CD23. *J. Biol. Chem.* **278**, 30469-30477.
- Franzke, C. W., Tasanen, K., Schacke, H., Zhou, Z., Tryggvason, K., Mauch, C., Zigrino, P., Sunnarborg, S., Lee, D. C., Fahrenholz, F. et al. (2002). Transmembrane collagen XVII, an epithelial adhesion protein, is shed from the cell surface by ADAMs. *EMBO J.* **21**, 5026-5035.
- Franzke, C. W., Cobzaru, C., Triantafyllopoulou, A., Loffek, S., Horiuchi, K., Threadgill, D. W., Kurz, T., van Rooijen, N., Bruckner-Tuderman, L. and Blobel, C. P. (2012). Epidermal ADAM17 maintains the skin barrier by regulating EGFR ligand-dependent terminal keratinocyte differentiation. *J. Exp. Med.* **209**, 1105-1119.
- Garton, K. J., Gough, P. J., Philalay, J., Wille, P. T., Blobel, C. P., Whitehead, R. H., Dempsey, P. J. and Raines, E. W. (2003). Stimulated shedding of vascular cell adhesion molecule 1 (VCAM-1) is mediated by tumor necrosis factor-alpha-converting enzyme (ADAM 17). *J. Biol. Chem.* **278**, 37459-37464.
- Gelling, R. W., Yan, W., Al-Noori, S., Pardini, A., Morton, G. J., Ogimoto, K., Schwartz, M. W. and Dempsey, P. J. (2008). Deficiency of TNFalpha converting enzyme (TACE/ADAM17) causes a lean, hypermetabolic phenotype in mice. *Endocrinology* **149**, 6053-6064.
- Gibb, D. R., El Shikh, M., Kang, D. J., Rowe, W. J., El Sayed, R., Cichy, J., Yagita, H., Tew, J. G., Dempsey, P. J., Crawford, H. C. et al. (2010). ADAM10 is essential for Notch2-dependent marginal zone B cell development and CD23 cleavage in vivo. *J. Exp. Med.* **207**, 623-635.
- Gibb, D. R., Saleem, S. J., Kang, D. J., Subler, M. A. and Conrad, D. H. (2011). ADAM10 overexpression shifts lympho- and myelopoiesis by dysregulating site 2/site 3 cleavage products of Notch. *J. Immunol.* **186**, 4244-4252.
- Glomski, K., Monette, S., Manova, K., De Strooper, B., Saftig, P. and Blobel, C. P. (2011). Deletion of Adam10 in endothelial cells leads to defects in organ-specific vascular structures. *Blood* **118**, 1163-1174.
- Gomez-Gaviro, M., Dominguez-Luis, M., Canchado, J., Calafat, J., Janssen, H., Lara-Pezzi, E., Fourie, A., Tugores, A., Valenzuela-Fernandez, A., Mollinedo, F. et al. (2007). Expression and regulation of the metalloproteinase ADAM-8 during human neutrophil pathophysiological activation and its catalytic activity on L-selectin shedding. *J. Immunol.* **178**, 8053-8063.
- Gomis-Rüth, F. X. (2003). Structural aspects of the metzincin clan of metalloendopeptidases. *Mol. Biotechnol.* **4**, 157-202.
- Gossens, K., Naus, S., Hollander, G. A. and Ziltener, H. J. (2010). Deficiency of the metalloproteinase-disintegrin ADAM8 is associated with thymic hypercellularity. *PLoS ONE* **5**, e12766.
- Guaiquil, V., Swendeman, S., Yoshida, T., Chavala, S., Campochiaro, P. A. and Blobel, C. P. (2009). ADAM9 is involved in pathological retinal neovascularization. *Mol. Cell. Biol.* **29**, 2694-2703.
- Guaiquil, V. H., Swendeman, S., Zhou, W., Guaiquil, P., Weskamp, G., Bartsch, J. W. and Blobel, C. P. (2010). ADAM8 is a negative regulator of retinal neovascularization and of the growth of heterotopically injected tumor cells in mice. *J. Mol. Med. (Berl.)* **88**, 497-505.
- Gunn, T. M., Azarani, A., Kim, P. H., Hyman, R. W., Davis, R. W. and Barsh, G. S. (2002). Identification and preliminary characterization of mouse Adam33. *BMC Genet.* **3**, 2.
- Guo, L. T., Shelton, G. D., Wewer, U. M. and Engvall, E. (2005). ADAM12 overexpression does not improve outcome in mice with laminin alpha2-deficient muscular dystrophy. *Neuromuscul. Disord.* **15**, 786-789.
- Gutwein, P., Mechttersheimer, S., Riedle, S., Stoeck, A., Gast, D., Joumaa, S., Zentgraf, H., Fogel, M. and Altevogt, D. P. (2003). ADAM10-mediated cleavage of L1 adhesion molecule at the cell surface and in released membrane vesicles. *FASEB J.* **17**, 292-294.
- Hansen, H. P., Dietrich, S., Kisseleva, T., Mokros, T., Mentlein, R., Lange, H. H., Murphy, G. and Lemke, H. (2000). CD30 shedding from Karpas 299 lymphoma cells is mediated by TNF-alpha-converting enzyme. *J. Immunol.* **165**, 6703-6709.
- Harsha, A., Stojadinovic, O., Brem, H., Sehara-Fujisawa, A., Wewer, U., Loomis, C. A., Blobel, C. P. and Tomic-Canic, M. (2008). ADAM12: a potential target for the treatment of chronic wounds. *J. Mol. Med. (Berl.)* **86**, 961-969.
- Hart, S., Fischer, O. M., Prenzel, N., Zwick-Wallasch, E., Schneider, M., Hennighausen, L. and Ullrich, A. (2005). GPCR-induced migration of breast carcinoma cells depends on both EGFR signal transactivation and EGFR-independent pathways. *Biol. Chem.* **386**, 845-855.
- Hartmann, D., de Strooper, B., Serneels, L., Craessaerts, K., Herreman, A., Annaert, W., Umans, L., Lubke, T., Lena Illert, A., von Figura, K. et al. (2002). The disintegrin/metalloprotease ADAM 10 is essential for Notch signalling but not for alpha-secretase activity in fibroblasts. *Hum. Mol. Genet.* **11**, 2615-2624.
- Hassemer, E. L., Le Gall, S. M., Liegel, R., McNally, M., Chang, B., Zeiss, C. J., Dubielzig, R. D., Horiuchi, K., Kimura, T., Okada, Y. et al. (2010). The waved with open eyelids (woe) locus is a hypomorphic mouse mutation in Adam17. *Genetics* **185**, 245-255.
- Hattori, M., Osterfield, M. and Flanagan, J. G. (2000). Regulated cleavage of a contact-mediated axon repellent. *Science* **289**, 1360-1365.
- He, Z. Y., Brakebusch, C., Fassler, R., Kreidberg, J. A., Primakoff, P. and Myles, D. G. (2003). None of the integrins known to be present on the mouse egg or to be ADAM receptors are essential for sperm-egg binding and fusion. *Dev. Biol.* **254**, 226-237.
- Hennet, T., Hagen, F. K., Tabak, L. A. and Marth, J. D. (1995). T-cell-specific deletion of a polypeptide N-acetylgalactosaminyl-transferase gene by site-directed recombination. *Proc. Natl. Acad. Sci. USA* **92**, 12070-12074.
- Higuchi, Y., Yasui, A., Matsuura, K. and Yamamoto, S. (2002). CD156 transgenic mice. Different responses between inflammatory types. *Pathobiology* **70**, 47-54.
- Hikita, A., Yana, I., Wakeyama, H., Nakamura, M., Kadono, Y., Oshima, Y., Nakamura, K., Seiki, M. and Tanaka, S. (2006). Negative regulation of osteoclastogenesis by ectodomain shedding of receptor activator of NF-kappaB ligand. *J. Biol. Chem.* **281**, 36846-36855.
- Horiuchi, K., Weskamp, G., Lum, L., Hammes, H. P., Cai, H., Brodie, T. A., Ludwig, T., Chiusaroli, R., Baron, R., Preissner, K. T. et al. (2003). Potential role for ADAM15 in pathological neovascularization in mice. *Mol. Cell. Biol.* **23**, 5614-5624.
- Horiuchi, K., Zhou, H. M., Kelly, K., Manova, K. and Blobel, C. P. (2005). Evaluation of the contributions of ADAMs 9, 12, 15, 17, and 19 to heart development and ectodomain shedding of neuregulins beta1 and beta2. *Dev. Biol.* **283**, 459-471.
- Horiuchi, K., Kimura, T., Miyamoto, T., Takaishi, H., Okada, Y., Toyama, Y. and Blobel, C. P. (2007). Cutting edge: TNF-alpha-converting enzyme (TACE/ADAM17) inactivation in mouse myeloid cells prevents lethality from endotoxin shock. *J. Immunol.* **179**, 2686-2689.
- Howard, L., Maciewicz, R. A. and Blobel, C. P. (2000). Cloning and characterization of ADAM28: evidence for autocatalytic pro-domain removal and for cell surface localization of mature ADAM28. *Biochem. J.* **348**, 21-27.
- Howard, L., Zheng, Y., Horrocks, M., Maciewicz, R. A. and Blobel, C. (2001). Catalytic activity of ADAM28. *FEBS Lett.* **498**, 82-86.
- Huang, X., Huang, P., Robinson, M. K., Stern, M. J. and Jin, Y. (2003). UNC-71, a disintegrin and metalloprotease (ADAM) protein, regulates motor axon guidance and sex myoblast migration in *C. elegans*. *Development* **130**, 3147-3161.
- Hundhausen, C., Misztela, D., Berkhout, T. A., Broadway, N., Saftig, P., Reiss, K., Hartmann, D., Fahrenholz, F., Postina, R., Matthews, V. et al. (2003). The disintegrin-like metalloproteinase ADAM10 is involved in constitutive cleavage of CX3CL1 (fractalkine) and regulates CX3CL1-mediated cell-cell adhesion. *Blood* **102**, 1186-1195.
- Huovila, A. P., Turner, A. J., Pelto-Huikko, M., Karkkainen, I. and Ortiz, R. M. (2005). Shedding light on ADAM metalloproteinases. *Trends Biochem. Sci.* **30**, 413-422.
- Huxley-Jones, J., Clarke, T. K., Beck, C., Toubaris, G., Robertson, D. L. and Boot-Handford, R. P. (2007). The evolution of the vertebrate metzincins; insights from *Ciona intestinalis* and *Danio rerio*. *BMC Evol. Biol.* **7**, 63.
- Iba, K., Albrechtsen, R., Gilpin, B., Frohlich, C., Loebel, F., Zolkiewska, A., Ishiguro, K., Kojima, T., Liu, W., Langford, J. K. et al. (2000). The cysteine-rich domain of human ADAM 12 supports cell adhesion through syndecans and triggers signaling events that lead to beta1 integrin-dependent cell spreading. *J. Cell Biol.* **149**, 1143-1156.
- Iida, A., Sakaguchi, K., Sato, K., Sakurai, H., Nishimura, D., Iwaki, A., Takeuchi, M., Kobayashi, M., Misaki, K., Yonemura, S. et al. (2010). Metalloprotease-dependent onset of blood circulation in zebrafish. *Curr. Biol.* **20**, 1110-1116.
- Inoshima, I., Inoshima, N., Wilke, G. A., Powers, M. E., Frank, K. M., Wang, Y. and Bubeck-Wardenburg, J. (2011). A *Staphylococcus aureus* pore-forming toxin subverts the activity of ADAM10 to cause lethal infection in mice. *Nat. Med.* **17**, 1310-1314.
- Inoshima, N., Wang, Y. and Wardenburg, J. B. (2012). Genetic requirement for ADAM10 in severe *Staphylococcus aureus* skin infection. *J. Invest. Dermatol.* **132**, 1513-1516.
- Ishizuka, H., Garcia-Palacios, V., Lu, G., Subler, M. A., Zhang, H., Boykin, C. S., Choi, S. J., Zhao, L., Patrene, K., Galson, D. L. et al. (2011). ADAM8 enhances osteoclast precursor fusion and osteoclast formation in vitro and in vivo. *J. Bone Miner. Res.* **26**, 169-181.
- Iwamoto, R. and Mekada, E. (2006). ErbB and HB-EGF signaling in heart development and function. *Cell Struct. Funct.* **31**, 1-14.

- Izumi, Y., Hirata, M., Hasuwa, H., Iwamoto, R., Umata, T., Miyado, K., Tamai, Y., Kurisaki, T., Sehara-Fujisawa, A., Ohno, S. et al. (1998). A metalloprotease-disintegrin, MDC9/meltrin-gamma/ADAM9 and PKCdelta are involved in TPA-induced ectodomain shedding of membrane-anchored heparin-binding EGF-like growth factor. *EMBO J.* **17**, 7260-7272.
- Jackson, L. F., Qiu, T. H., Sunnarborg, S. W., Chang, A., Zhang, C., Patterson, C. and Lee, D. C. (2003). Defective valvulogenesis in HB-EGF and TACE-null mice is associated with aberrant BMP signaling. *EMBO J.* **22**, 2704-2716.
- Janes, P. W., Saha, N., Barton, W. A., Kolev, M. V., Wimmer-Kleikamp, S. H., Nievergall, E., Blobel, C. P., Himanen, J. P., Lackmann, M. and Nikolov, D. B. (2005). Adam meets Eph: an ADAM substrate recognition module acts as a molecular switch for ephrin cleavage in trans. *Cell* **123**, 291-304.
- Janes, P. W., Wimmer-Kleikamp, S. H., Frangakis, A. S., Treble, K., Griesshaber, B., Sabet, O., Grabenbauer, M., Ting, A. Y., Saftig, P., Bastiaens, P. I. et al. (2009). Cytoplasmic relaxation of active Eph controls ephrin shedding by ADAM10. *PLoS Biol.* **7**, e1000215.
- Jarriault, S. and Greenwald, I. (2005). Evidence for functional redundancy between *C. elegans* ADAM proteins SUP-17/Kuzbanian and ADM-4/TACE. *Dev. Biol.* **287**, 1-10.
- Jie, Z., Hu, Z., Bai, C. and Jin, M. (2011). ADAM33 gene polymorphisms associate with asthma susceptibility and severity in East China han population. *J. Asthma* **48**, 979-985.
- Jorissen, E., Prox, J., Bernreuther, C., Weber, S., Schwanbeck, R., Serneels, L., Snellinx, A., Craessaerts, K., Thathiah, A., Teseur, J. et al. (2010). The disintegrin/metalloproteinase ADAM10 is essential for the establishment of the brain cortex. *J. Neurosci.* **30**, 4833-4844.
- Kang, T., Zhao, Y. G., Pei, D., Sucic, J. F. and Sang, Q. X. (2002). 'Intracellular activation of human ADAM19/disintegrin and metalloproteinase 19 by furin occurs via one of the two consecutive recognition sites. *J. Biol. Chem.* **277**, 25583-25591.
- Kawaguchi, N., Xu, X., Tajima, R., Kronqvist, P., Sundberg, C., Loechel, F., Albrechtsen, R. and Wewer, U. M. (2002). ADAM 12 protease induces adipogenesis in transgenic mice. *Am. J. Pathol.* **160**, 1895-1903.
- Kelly, K., Hutchinson, G., Nebenius-Oosthuizen, D., Smith, A. J., Bartsch, J. W., Horiuchi, K., Rittger, A., Manova, K., Docherty, A. J. and Blobel, C. P. (2005). Metalloprotease-disintegrin ADAM8: expression analysis and targeted deletion in mice. *Dev. Dyn.* **232**, 221-231.
- Kenny, P. A. and Bissell, M. J. (2007). Targeting TACE-dependent EGFR ligand shedding in breast cancer. *J. Clin. Invest.* **117**, 337-345.
- Kisanuki, Y. Y., Hammer, R. E., Miyazaki, J., Williams, S. C., Richardson, J. A. and Yanagisawa, M. (2001). Tie2-Cre transgenic mice: a new model for endothelial cell-lineage analysis in vivo. *Dev. Biol.* **230**, 230-242.
- Koike, H., Tomioka, S., Sorimachi, H., Saido, T. C., Maruyama, K., Okuyama, A., Fujisawa-Sehara, A., Ohno, S., Suzuki, K. and Ishiura, S. (1999). Membrane-anchored metalloprotease MDC9 has an alpha-secretase activity responsible for processing the amyloid precursor protein. *Biochem. J.* **343**, 371-375.
- Komatsu, K., Wakatsuki, S., Yamada, S., Yamamura, K., Miyazaki, J. and Sehara-Fujisawa, A. (2007). Meltrin beta expressed in cardiac neural crest cells is required for ventricular septum formation of the heart. *Dev. Biol.* **303**, 82-92.
- Kopan, R. and Ilagan, M. X. (2009). The canonical Notch signaling pathway: unfolding the activation mechanism. *Cell* **137**, 216-233.
- Kronqvist, P., Kawaguchi, N., Albrechtsen, R., Xu, X., Schroder, H. D., Moghadaszadeh, B., Nielsen, F. C., Frohlich, C., Engvall, E. and Wewer, U. M. (2002). ADAM12 alleviates the skeletal muscle pathology in mdx dystrophic mice. *Am. J. Pathol.* **161**, 1535-1540.
- Kuhn, P. H., Wang, H., Dislich, B., Colombo, A., Zeitschel, U., Ellwart, J. W., Kremmer, E., Rossner, S. and Lichtenthaler, S. F. (2010). ADAM10 is the physiologically relevant, constitutive alpha-secretase of the amyloid precursor protein in primary neurons. *EMBO J.* **29**, 3020-3032.
- Kurisaki, T., Masuda, A., Sudo, K., Sakagami, J., Higashiyama, S., Matsuda, Y., Nagabukuro, A., Tsuji, A., Nabeshima, Y., Asano, M. et al. (2003). Phenotypic analysis of Meltrin alpha (ADAM12)-deficient mice: involvement of Meltrin alpha in adipogenesis and myogenesis. *Mol. Cell. Biol.* **23**, 55-61.
- Kurohara, K., Komatsu, K., Kurisaki, T., Masuda, A., Irie, N., Asano, M., Sudo, K., Nabeshima, Y., Iwakura, Y. and Sehara-Fujisawa, A. (2004). Essential roles of Meltrin beta (ADAM19) in heart development. *Dev. Biol.* **267**, 14-28.
- Kveiborg, M., Frohlich, C., Albrechtsen, R., Tischler, V., Dietrich, N., Holck, P., Kronqvist, P., Rank, F., Mercurio, A. M. and Wewer, U. M. (2005). A role for ADAM12 in breast tumor progression and stromal cell apoptosis. *Cancer Res.* **65**, 4754-4761.
- Kveiborg, M., Albrechtsen, R., Rudkjaer, L., Wen, G., Damgaard-Pedersen, K. and Wewer, U. M. (2006). ADAM12-S stimulates bone growth in transgenic mice by modulating chondrocyte proliferation and maturation. *J. Bone Miner. Res.* **21**, 1288-1296.
- La Marca, R., Cerri, F., Horiuchi, K., Bachi, A., Feltri, M. L., Wrabetz, L., Blobel, C. P., Quattrini, A., Salzer, J. L. and Taveggia, C. (2011). TACE (ADAM17) inhibits Schwann cell myelination. *Nat. Neurosci.* **14**, 857-865.
- Lambert, D. W., Yarski, M., Warner, F. J., Thornhill, P., Parkin, E. T., Smith, A. I., Hooper, N. M. and Turner, A. J. (2005). Tumor necrosis factor-alpha convertase (ADAM17) mediates regulated ectodomain shedding of the severe-acute respiratory syndrome-coronavirus (SARS-CoV) receptor, angiotensin-converting enzyme-2 (ACE2). *J. Biol. Chem.* **280**, 30113-30119.
- Lammich, S., Kojro, E., Postina, R., Gilbert, S., Pfeiffer, R., Jasnowski, M., Haass, C. and Fahrenholz, F. (1999). Constitutive and regulated alpha-secretase cleavage of Alzheimer's amyloid precursor protein by a disintegrin metalloprotease. *Proc. Natl. Acad. Sci. USA* **96**, 3922-39217.
- Li, N., Wang, Y., Forbes, K., Vignali, K. M., Heale, B. S., Saftig, P., Hartmann, D., Black, R. A., Rossi, J. J., Blobel, C. P. et al. (2007). Metalloproteases regulate T-cell proliferation and effector function via LAG-3. *EMBO J.* **26**, 494-504.
- Liu, P. C., Liu, X., Li, Y., Covington, M., Wynn, R., Huber, R., Hillman, M., Yang, G., Ellis, D., Marando, C. et al. (2006). Identification of ADAM10 as a major source of HER2 ectodomain shed activity in HER2 overexpressing breast cancer cells. *Cancer Biol. Ther.* **5**, 657-664.
- Lo Sardo, V., Zuccato, C., Gaudenzi, G., Vitali, B., Ramos, C., Tartari, M., Myre, M. A., Walker, J. A., Pistocchi, A., Conti, L. et al. (2012). An evolutionary recent neuroepithelial cell adhesion function of huntingtin implicates ADAM10-Ncadherin. *Nat. Neurosci.* **15**, 713-721.
- Loechel, F., Fox, J. W., Murphy, G., Albrechtsen, R. and Wewer, U. M. (2000). ADAM 12-S cleaves IGFBP-3 and IGFBP-5 and is inhibited by TIMP-3. *Biochem. Biophys. Res. Commun.* **278**, 511-515.
- Long, C., Wang, Y., Herrera, A. H., Horiuchi, K. and Walcheck, B. (2010). In vivo role of leukocyte ADAM17 in the inflammatory and host responses during *E. coli*-mediated peritonitis. *J. Leukoc. Biol.* **87**, 1097-1101.
- Lorenzen, I., Trad, A. and Grotzinger, J. (2011). Multimerisation of A disintegrin and metalloprotease protein-17 (ADAM17) is mediated by its EGF-like domain. *Biochem. Biophys. Res. Commun.* **415**, 330-336.
- Lorenzen, I., Lokau, J., Dusterhoft, S., Trad, A., Garbers, C., Scheller, J., Rose-John, S. and Grotzinger, J. (2012). The membrane-proximal domain of A Disintegrin and Metalloprotease 17 (ADAM17) is responsible for recognition of the interleukin-6 receptor and interleukin-1 receptor II. *FEBS Lett.* **586**, 1093-1100.
- Lum, L., Reid, M. S. and Blobel, C. P. (1998). Intracellular maturation of the mouse metalloprotease disintegrin MDC15. *J. Biol. Chem.* **273**, 26236-26247.
- Manilay, J. O., Anderson, A. C., Kang, C. and Robey, E. A. (2005). Impairment of thymocyte development by dominant-negative Kuzbanian (ADAM-10) is rescued by the Notch ligand, delta-1. *J. Immunol.* **174**, 6732-6741.
- Marcello, E., Gardoni, F., Di Luca, M. and Perez-Otano, I. (2010). An arginine stretch limits ADAM10 exit from the endoplasmic reticulum. *J. Biol. Chem.* **285**, 10376-10384.
- Maretzky, T., Reiss, K., Ludwig, A., Buchholz, J., Scholz, F., Proksch, E., de Strooper, B., Hartmann, D. and Saftig, P. (2005a). ADAM10 mediates E-cadherin shedding and regulates epithelial cell-cell adhesion, migration, and beta-catenin translocation. *Proc. Natl. Acad. Sci. USA* **102**, 9182-9187.
- Maretzky, T., Schulte, M., Ludwig, A., Rose-John, S., Blobel, C., Hartmann, D., Altevogt, P., Saftig, P. and Reiss, K. (2005b). L1 is sequentially processed by two differently activated metalloproteases and presenilin/gamma-secretase and regulates neural cell adhesion, cell migration, and neurite outgrowth. *Mol. Cell. Biol.* **25**, 9040-9053.
- Martin, J., Eynstone, L. V., Davies, M., Williams, J. D. and Steadman, R. (2002). The role of ADAM 15 in glomerular mesangial cell migration. *J. Biol. Chem.* **277**, 33683-33689.
- Martin, L., Fluhrer, R., Reiss, K., Kremmer, E., Saftig, P. and Haass, C. (2008). Regulated intramembrane proteolysis of Bri2 (Itm2b) by ADAM10 and SPPL2a/SPPL2b. *J. Biol. Chem.* **283**, 1644-1652.
- Martin, L., Fluhrer, R. and Haass, C. (2009). Substrate requirements for SPPL2b-dependent regulated intramembrane proteolysis. *J. Biol. Chem.* **284**, 5662-5670.
- Marzia, M., Guaiquil, V., Horne, W. C., Blobel, C. P., Baron, R. and Chiusaroli, R. (2011). Lack of ADAM15 in mice is associated with increased osteoblast function and bone mass. *Biol. Chem.* **392**, 877-885.
- Masaki, M., Kurisaki, T., Shirakawa, K. and Sehara-Fujisawa, A. (2005). Role of meltrin [alpha] (ADAM12) in obesity induced by high-fat diet. *Endocrinology* **146**, 1752-1763.
- Maskos, K., Fernandez-Catalan, C., Huber, R., Bourenkov, G. P., Bartunik, H., Ellestad, G. A., Reddy, P., Wolfson, M. F., Rauch, C. T., Castner, B. J. et al. (1998). Crystal structure of the catalytic domain of human tumor necrosis factor-alpha-converting enzyme. *Proc. Natl. Acad. Sci. USA* **95**, 3408-3412.
- Mathews, J. A., Ford, J., Norton, S., Kang, D., Dellinger, A., Gibb, D. R., Ford, A. Q., Massay, H., Kepley, C. L., Scherle, P. et al. (2011). A potential new target for asthma therapy: a disintegrin and metalloprotease 10 (ADAM10) involvement in murine experimental asthma. *Allergy* **66**, 1193-1200.
- Matthews, V., Schuster, B., Schutze, S., Bussmeyer, I., Ludwig, A., Hundhausen, C., Sadowski, T., Saftig, P., Hartmann, D., Kallen, K. J. et al. (2003). Cellular cholesterol depletion triggers shedding of the human interleukin-6 receptor by ADAM10 and ADAM17 (TACE). *J. Biol. Chem.* **278**, 38829-38839.



- Mauch, C., Zamek, J., Abety, A. N., Grimberg, G., Fox, J. W. and Zigrino, P. (2010). Accelerated wound repair in ADAM-9 knockout animals. *J. Invest. Dermatol.* **130**, 2120-2130.
- Mazzocca, A., Coppari, R., De Franco, R., Cho, J. Y., Libermann, T. A., Pinzani, M. and Toker, A. (2005). A secreted form of ADAM9 promotes carcinoma invasion through tumor-stromal interactions. *Cancer Res.* **65**, 4728-4738.
- McCusker, C., Cousin, H., Neuner, R. and Alfandari, D. (2009). Extracellular cleavage of cadherin-11 by ADAM metalloproteases is essential for *Xenopus* cranial neural crest cell migration. *Mol. Biol. Cell* **20**, 78-89.
- McIlwain, D. R., Lang, P. A., Maretzky, T., Hamada, K., Ohishi, K., Maney, S. K., Berger, T., Murthy, A., Duncan, G., Xu, H. C. et al. (2012). iRhom2 regulation of TACE controls TNF-mediated protection against *Listeria* and responses to LPS. *Science* **335**, 229-232.
- Meng, J. F., McFall, C. and Rosenwasser, L. J. (2007). Polymorphism R62W results in resistance of CD23 to enzymatic cleavage in cultured cells. *Genes Immun.* **8**, 215-223.
- Meyer, H., Panz, M., Albrecht, S., Drechsler, M., Wang, S., Husken, M., Lehmacher, C. and Paululat, A. (2011). Drosophila metalloproteases in development and differentiation: the role of ADAM proteins and their relatives. *Eur. J. Cell Biol.* **90**, 770-778.
- Milla, M. E., Leesnitzer, M. A., Moss, M. L., Clay, W. C., Carter, H. L., Miller, A. B., Su, J. L., Lambert, M. H., Willard, D. H., Sheeley, D. M. et al. (1999). Specific sequence elements are required for the expression of functional tumor necrosis factor- $\alpha$ -converting enzyme (TACE). *J. Biol. Chem.* **274**, 30563-30570.
- Millichip, M. I., Dallas, D. J., Wu, E., Dale, S. and McKie, N. (1998). The metallo-disintegrin ADAM10 (MADM) from bovine kidney has type IV collagenase activity in vitro. *Biochem. Biophys. Res. Commun.* **245**, 594-598.
- Mitchell, K. J., Pinson, K. I., Kelly, O. G., Brennan, J., Zupicich, J., Scherz, P., Leighton, P. A., Goodrich, L. V., Lu, X., Avery, B. J. et al. (2001). Functional analysis of secreted and transmembrane proteins critical to mouse development. *Nat. Genet.* **28**, 241-249.
- Miyake, Y., Tanaka, K. and Arakawa, M. (2012). ADAM33 polymorphisms, smoking and asthma in Japanese women: the Kyushu Okinawa Maternal and Child Health Study. *Int. J. Tuberc. Lung Dis.* **16**, 974-979.
- Mochizuki, S., Shimoda, M., Shiomi, T., Fujii, Y. and Okada, Y. (2004). ADAM28 is activated by MMP-7 (matrilysin-1) and cleaves insulin-like growth factor binding protein-3. *Biochem. Biophys. Res. Commun.* **315**, 79-84.
- Mochizuki, S., Tanaka, R., Shimoda, M., Onuma, J., Fujii, Y., Jinno, H. and Okada, Y. (2010). Connective tissue growth factor is a substrate of ADAM28. *Biochem. Biophys. Res. Commun.* **402**, 651-657.
- Mohan, S., Thompson, G. R., Amaar, Y. G., Hathaway, G., Tschesche, H. and Baylink, D. J. (2002). ADAM-9 is an insulin-like growth factor binding protein-5 protease produced and secreted by human osteoblasts. *Biochemistry* **41**, 15394-15403.
- Mori, S., Tanaka, M., Nanba, D., Nishiwaki, E., Ishiguro, H., Higashiyama, S. and Matsuura, N. (2003). PACSIN3 binds ADAM12/meltrin alpha and up-regulates ectodomain shedding of heparin-binding epidermal growth factor-like growth factor. *J. Biol. Chem.* **278**, 46029-46034.
- Moss, M. L., Jin, S. L., Milla, M. E., Bickett, D. M., Burkhart, W., Carter, H. L., Chen, W. J., Clay, W. C., Didsbury, J. R., Hassler, D. et al. (1997). Cloning of a disintegrin metalloproteinase that processes precursor tumour-necrosis factor- $\alpha$ . *Nature* **385**, 733-736.
- Moss, M. L., Stoeck, A., Yan, W. and Dempsey, P. J. (2008). ADAM10 as a target for anti-cancer therapy. *Curr. Pharm. Biotechnol.* **9**, 2-8.
- Murthy, A., Defamie, V., Smookler, D. S., Di Grappa, M. A., Horiuchi, K., Federici, M., Sibilio, M., Blobel, C. P. and Khokha, R. (2010). Ectodomain shedding of EGFR ligands and TNFR1 dictates hepatocyte apoptosis during fulminant hepatitis in mice. *J. Clin. Invest.* **120**, 2731-2744.
- Murthy, A., Shao, Y. W., Narala, S. R., Molyneux, S. D., Zuniga-Pflucker, J. C. and Khokha, R. (2012). Notch activation by the metalloproteinase ADAM17 regulates myeloproliferation and atopic barrier immunity by suppressing epithelial cytokine synthesis. *Immunity* **36**, 105-119.
- Nagano, O., Murakami, D., Hartmann, D., De Strooper, B., Saftig, P., Iwatsubo, T., Nakajima, M., Shinohara, M. and Saya, H. (2004). Cell-matrix interaction via CD44 is independently regulated by different metalloproteinases activated in response to extracellular Ca(2+) influx and PKC activation. *J. Cell Biol.* **165**, 893-902.
- Najj, A. J., Day, K. C. and Day, M. L. (2008). The ectodomain shedding of E-cadherin by ADAM15 supports ErbB receptor activation. *J. Biol. Chem.* **283**, 18393-18401.
- Nakamura, T., Abe, H., Hirata, A. and Shimoda, C. (2004). ADAM family protein Mde10 is essential for development of spore envelopes in the fission yeast *Schizosaccharomyces pombe*. *Eukaryot. Cell* **3**, 27-39.
- Naus, S., Reipschlager, S., Wildeboer, D., Lichtenthaler, S. F., Mitterreiter, S., Guan, Z., Moss, M. L. and Bartsch, J. W. (2006). Identification of candidate substrates for ectodomain shedding by the metalloprotease-disintegrin ADAM8. *Biol. Chem.* **387**, 337-346.
- Naus, S., Blanchet, M. R., Gossens, K., Zaph, C., Bartsch, J. W., McNagny, K. M. and Ziltener, H. J. (2010). The metalloprotease-disintegrin ADAM8 is essential for the development of experimental asthma. *Am. J. Respir. Crit. Care Med.* **181**, 1318-1328.
- Neuner, R., Cousin, H., McCusker, C., Coyne, M. and Alfandari, D. (2009). *Xenopus* ADAM19 is involved in neural, neural crest and muscle development. *Mech. Dev.* **126**, 240-255.
- Nishimura, H., Kim, E., Nakanishi, T. and Baba, T. (2004). Possible function of the ADAM1a/ADAM2 Fertilin complex in the appearance of ADAM3 on the sperm surface. *J. Biol. Chem.* **279**, 34957-34962.
- Orth, P., Reichert, P., Wang, W., Prosise, W. W., Yarosh-Tomaine, T., Hammond, G., Ingram, R. N., Xiao, L., Mirza, U. A., Zou, J. et al. (2004). Crystal structure of the catalytic domain of human ADAM33. *J. Mol. Biol.* **335**, 129-137.
- Overall, C. M. and Blobel, C. P. (2007). In search of partners: linking extracellular proteases to substrates. *Nat. Rev. Mol. Cell Biol.* **8**, 245-257.
- Pan, D. and Rubin, G. M. (1997). Kuzbanian controls proteolytic processing of Notch and mediates lateral inhibition during *Drosophila* and vertebrate neurogenesis. *Cell* **90**, 271-280.
- Parry, D. A., Toomes, C., Bida, L., Danciger, M., Towns, K. V., McKibbin, M., Jacobson, S. G., Logan, C. V., Ali, M., Bond, J. et al. (2009). Loss of the metalloprotease ADAM9 leads to cone-rod dystrophy in humans and retinal degeneration in mice. *Am. J. Hum. Genet.* **84**, 683-691.
- Paulissen, G., Rocks, N., Gueders, M. M., Bedoret, D., Crahay, C., Quesada-Calvo, F., Hacha, J., Bekaert, S., Desmet, C., Foidart, J. M. et al. (2011). ADAM-8, a metalloproteinase, drives acute allergen-induced airway inflammation. *Eur. J. Immunol.* **41**, 380-391.
- Peduto, L., Reuter, V. E., Shaffer, D. R., Scher, H. I. and Blobel, C. P. (2005). Critical function for ADAM9 in mouse prostate cancer. *Cancer Res.* **65**, 9312-9319.
- Peschon, J. J., Slack, J. L., Reddy, P., Stocking, K. L., Sunnarborg, S. W., Lee, D. C., Russell, W. E., Castner, B. J., Johnson, R. S., Fitzner, J. N. et al. (1998). An essential role for ectodomain shedding in mammalian development. *Science* **282**, 1281-1284.
- Pierfelice, T., Alberi, L. and Gaiano, N. (2011). Notch in the vertebrate nervous system: an old dog with new tricks. *Neuron* **69**, 840-855.
- Postina, R., Schroeder, A., Dewachter, I., Bohl, J., Schmitt, U., Kojro, E., Prinzen, C., Endres, K., Hiemke, C., Blessing, M. et al. (2004). A disintegrin-metalloproteinase prevents amyloid plaque formation and hippocampal defects in an Alzheimer disease mouse model. *J. Clin. Invest.* **113**, 1456-1464.
- Prenzel, N., Zwick, E., Daub, H., Leserer, M., Abraham, R., Wallasch, C. and Ullrich, A. (1999). EGF receptor transactivation by G-protein-coupled receptors requires metalloproteinase cleavage of proHB-EGF. *Nature* **402**, 884-888.
- Prox, J., Willenbrock, M., Weber, S., Lehmann, T., Schmidt-Arras, D., Schwanbeck, R., Saftig, P. and Schwake, M. (2012). Tetraspanin15 regulates cellular trafficking and activity of the ectodomain sheddase ADAM10. *Cell. Mol. Life Sci.* **69**, 2919-2932.
- Puente, X. S. and Lopez-Otin, C. (2004). A genomic analysis of rat proteases and protease inhibitors. *Genome Res.* **14**, 609-622.
- Raby, B. A., Silverman, E. K., Kwiatkowski, D. J., Lange, C., Lazarus, R. and Weiss, S. T. (2004). ADAM33 polymorphisms and phenotype associations in childhood asthma. *J. Allergy Clin. Immunol.* **113**, 1071-1078.
- Reddy, P., Slack, J. L., Davis, R., Cerretti, D. P., Kozlosky, C. J., Blanton, R. A., Shows, D., Peschon, J. J. and Black, R. A. (2000). Functional analysis of the domain structure of tumor necrosis factor- $\alpha$ -converting enzyme. *J. Biol. Chem.* **275**, 14608-14614.
- Reiss, K. and Saftig, P. (2009). The 'a disintegrin and metalloprotease' (ADAM) family of sheddases: physiological and cellular functions. *Semin. Cell Dev. Biol.* **20**, 126-137.
- Reiss, K., Maretzky, T., Ludwig, A., Tousseyn, T., de Strooper, B., Hartmann, D. and Saftig, P. (2005). ADAM10 cleavage of N-cadherin and regulation of cell-cell adhesion and beta-catenin nuclear signalling. *EMBO J.* **24**, 742-752.
- Reiss, K., Maretzky, T., Haas, I. G., Schulte, M., Ludwig, A., Frank, M. and Saftig, P. (2006). Regulated ADAM10-dependent ectodomain shedding of gamma-proteoglycan C3 modulates cell-cell adhesion. *J. Biol. Chem.* **281**, 21735-21744.
- Roca, C. and Adams, R. H. (2007). Regulation of vascular morphogenesis by Notch signaling. *Genes Dev.* **21**, 2511-2524.
- Roghani, M., Becherer, J. D., Moss, M. L., Atherton, R. E., Erdjument-Bromage, H., Arribas, J., Blackburn, R. K., Weskamp, G., Tempst, P. and Blobel, C. P. (1999). Metalloprotease-disintegrin MDC9: intracellular maturation and catalytic activity. *J. Biol. Chem.* **274**, 3531-3540.
- Rooke, J., Pan, D., Xu, T. and Rubin, G. M. (1996). KUZ, a conserved metalloprotease-disintegrin protein with two roles in *Drosophila* neurogenesis. *Science* **273**, 1227-1231.
- Roy, R., Wewer, U. M., Zurakowski, D., Pories, S. E. and Moses, M. A. (2004). ADAM 12 cleaves extracellular matrix proteins and correlates with cancer status and stage. *J. Biol. Chem.* **279**, 51323-51330.

- Saftig, P. and Reiss, K. (2011). The "A Disintegrin And Metalloproteases" ADAM10 and ADAM17: novel drug targets with therapeutic potential? *Eur. J. Cell Biol.* **90**, 527-535.
- Sagane, K., Hayakawa, K., Kai, J., Hirohashi, T., Takahashi, E., Miyamoto, N., Ino, M., Oki, T., Yamazaki, K. and Nagasu, T. (2005). Ataxia and peripheral nerve hypomyelination in ADAM22-deficient mice. *BMC Neurosci.* **6**, 33.
- Sahin, U. and Blobel, C. P. (2007). Ectodomain shedding of the EGF-receptor ligand epigen is mediated by ADAM17. *FEBS Lett.* **581**, 41-44.
- Sahin, U., Weskamp, G., Kelly, K., Zhou, H. M., Higashiyama, S., Peschon, J., Hartmann, D., Saftig, P. and Blobel, C. P. (2004). Distinct roles for ADAM10 and ADAM17 in ectodomain shedding of six EGFR ligands. *J. Cell Biol.* **164**, 769-779.
- Schafer, B., Gschwind, A. and Ullrich, A. (2004). Multiple G-protein-coupled receptor signals converge on the epidermal growth factor receptor to promote migration and invasion. *Oncogene* **23**, 991-999.
- Schlomm, U., Wildeboer, D., Webster, A., Antropova, O., Zeuschner, D., Knight, C. G., Docherty, A. J., Lambert, M., Skelton, L., Jockusch, H. et al. (2002). The metalloprotease disintegrin ADAM8. Processing by autocatalysis is required for proteolytic activity and cell adhesion. *J. Biol. Chem.* **277**, 48210-48219.
- Schlondorff, J., Becherer, J. D. and Blobel, C. P. (2000). Intracellular maturation and localization of the tumour necrosis factor alpha convertase (TACE). *Biochem. J.* **347**, 131-138.
- Schmitt, U., Hiemke, C., Fahrenholz, F. and Schroeder, A. (2006). Overexpression of two different forms of the alpha-secretase ADAM10 affects learning and memory in mice. *Behav. Brain Res.* **175**, 278-284.
- Schulte, M., Reiss, K., Lettau, M., Maretzky, T., Ludwig, A., Hartmann, D., de Strooper, B., Janssen, O. and Saftig, P. (2007). ADAM10 regulates FasL cell surface expression and modulates FasL-induced cytotoxicity and activation-induced cell death. *Cell Death Differ.* **14**, 1040-1049.
- Schulz, B., Pruessmeyer, J., Maretzky, T., Ludwig, A., Blobel, C. P., Saftig, P. and Reiss, K. (2008). ADAM10 regulates endothelial permeability and T-Cell transmigration by proteolysis of vascular endothelial cadherin. *Circ. Res.* **102**, 1192-1201.
- Seals, D. F. and Courtneidge, S. A. (2003). The ADAMs family of metalloproteases: multidomain proteins with multiple functions. *Genes Dev.* **17**, 7-30.
- Shamsadin, R., Adham, I. M., Nayernia, K., Heinlein, U. A., Oberwinkler, H. and Engel, W. (1999). Male mice deficient for germ-cell cyritestin are infertile. *Biol. Reprod.* **61**, 1445-1451.
- Shi, W., Chen, H., Sun, J., Buckley, S., Zhao, J., Anderson, K. D., Williams, R. G. and Warburton, D. (2003). TACE is required for fetal murine cardiac development and modeling. *Dev. Biol.* **261**, 371-380.
- Shirakabe, K., Wakatsuki, S., Kurisaki, T. and Fujisawa-Sehara, A. (2001). Roles of Meltrin beta /ADAM19 in the processing of neuregulin. *J. Biol. Chem.* **276**, 9352-9358.
- Six, E., Ndiaye, D., Laabi, Y., Brou, C., Gupta-Rossi, N., Israel, A. and Logeat, F. (2003). The Notch ligand Delta1 is sequentially cleaved by an ADAM protease and gamma-secretase. *Proc. Natl. Acad. Sci. USA* **100**, 7638-7643.
- Smith, K. M., Gaultier, A., Cousin, H., Alfandari, D., White, J. M. and DeSimone, D. W. (2002). The cysteine-rich domain regulates ADAM protease function in vivo. *J. Cell Biol.* **159**, 893-902.
- Solanas, G., Cortina, C., Sevillano, M. and Batlle, E. (2011). Cleavage of E-cadherin by ADAM10 mediates epithelial cell sorting downstream of EphB signalling. *Nat. Cell Biol.* **13**, 1100-1107.
- Sulis, M. L., Saftig, P. and Ferrando, A. A. (2011). Redundancy and specificity of the metalloprotease system mediating oncogenic NOTCH1 activation in T-ALL. *Leukemia* **25**, 1564-1569.
- Sundberg, C., Thodeti, C. K., Kveiborg, M., Larsson, C., Parker, P., Albrechtsen, R. and Wewer, U. M. (2004). Regulation of ADAM12 cell-surface expression by protein kinase C epsilon. *J. Biol. Chem.* **279**, 51601-51611.
- Takahashi, E., Sagane, K., Nagasu, T. and Kuromitsu, J. (2006a). Altered nociceptive response in ADAM11-deficient mice. *Brain Res.* **1097**, 39-42.
- Takahashi, E., Sagane, K., Oki, T., Yamazaki, K., Nagasu, T. and Kuromitsu, J. (2006b). Deficits in spatial learning and motor coordination in ADAM11-deficient mice. *BMC Neurosci.* **7**, 19.
- Takeda, S., Igarashi, T., Mori, H. and Araki, S. (2006). Crystal structures of VAP1 reveal ADAMs' MDC domain architecture and its unique C-shaped scaffold. *EMBO J.* **25**, 2388-2396.
- Tian, L., Wu, X., Chi, C., Han, M., Xu, T. and Zhuang, Y. (2008). ADAM10 is essential for proteolytic activation of Notch during thymocyte development. *Int. Immunol.* **20**, 1181-1187.
- Toussey, T., Thathiah, A., Jorissen, E., Raemaekers, T., Konietzko, U., Reiss, K., Maes, E., Snellinx, A., Serneels, L., Nyabi, O. et al. (2009). ADAM10, the rate-limiting protease of regulated intramembrane proteolysis of Notch and other proteins, is processed by ADAM9, ADAM15, and the gamma-secretase. *J. Biol. Chem.* **284**, 11738-11747.
- Tsakadze, N. L., Sithu, S. D., Sen, U., English, W. R., Murphy, G. and D'Souza, S. E. (2006). Tumor necrosis factor-alpha-converting enzyme (TACE/ADAM-17) mediates the ectodomain cleavage of intercellular adhesion molecule-1 (ICAM-1). *J. Biol. Chem.* **281**, 3157-3164.
- Van Eerdewegh, P., Little, R. D., Dupuis, J., Del Mastro, R. G., Falls, K., Simon, J., Torrey, D., Pandit, S., McKenny, J., Braunschweiger, K. et al. (2002). Association of the ADAM33 gene with asthma and bronchial hyperresponsiveness. *Nature* **418**, 426-430.
- Vincent, B., Paitel, E., Saftig, P., Frobert, Y., Hartmann, D., De Strooper, B., Grassi, J., Lopez-Perez, E. and Checler, F. (2001). The disintegrins ADAM10 and TACE contribute to the constitutive and phorbol ester-regulated normal cleavage of the cellular prion protein. *J. Biol. Chem.* **276**, 37743-37746.
- Wakatsuki, S., Yumoto, N., Komatsu, K., Araki, T. and Sehara-Fujisawa, A. (2009). Roles of meltrin-beta/ADAM19 in progression of Schwann cell differentiation and myelination during sciatic nerve regeneration. *J. Biol. Chem.* **284**, 2957-2966.
- Waldhauer, I., Goehlsdorf, D., Gieseke, F., Weinschenk, T., Wittenbrink, M., Ludwig, A., Stevanovic, S., Rammensee, H. G. and Steinle, A. (2008). Tumor-associated MICA is shed by ADAM proteases. *Cancer Res.* **68**, 6368-6376.
- Wang, Y., Zhang, A. C., Ni, Z., Herrera, A. and Walcheck, B. (2010). ADAM17 activity and other mechanisms of soluble L-selectin production during death receptor-induced leukocyte apoptosis. *J. Immunol.* **184**, 4447-4454.
- Watt, F. M., Estrach, S. and Ambler, C. A. (2008). Epidermal Notch signalling: differentiation, cancer and adhesion. *Curr. Opin. Cell Biol.* **20**, 171-179.
- Weber, S., Niessen, M. T., Prox, J., Lullmann-Rauch, R., Schmitz, A., Schwanbeck, R., Blobel, C. P., Jorissen, E., de Strooper, B., Niessen, C. M. et al. (2011). The disintegrin/metalloproteinase Adam10 is essential for epidermal integrity and Notch-mediated signaling. *Development* **138**, 495-505.
- Wei, S., Xu, G., Bridges, L. C., Williams, P., White, J. M. and DeSimone, D. W. (2010). ADAM13 induces cranial neural crest by cleaving class B Ephrins and regulating Wnt signaling. *Dev. Cell* **19**, 345-352.
- Wei, S., Xu, G., Bridges, L. C., Williams, P., Nakayama, T., Shah, A., Grainger, R. M., White, J. M. and DeSimone, D. W. (2012). Roles of ADAM13-regulated Wnt activity in early Xenopus eye development. *Dev. Biol.* **363**, 147-154.
- Wen, C., Metzstein, M. M. and Greenwald, I. (1997). SUP-17, a Caenorhabditis elegans ADAM protein related to Drosophila KUZBANIAN, and its role in LIN-12/NOTCH signalling. *Development* **124**, 4759-4767.
- Weskamp, G., Cai, H., Brodie, T. A., Higashiyama, S., Manova, K., Ludwig, T. and Blobel, C. P. (2002). Mice lacking the metalloprotease-disintegrin MDC9 (ADAM9) have no evident major abnormalities during development or adult life. *Mol. Cell Biol.* **22**, 1537-1544.
- Weskamp, G., Ford, J. W., Sturgill, J., Martin, S., Docherty, A. J., Swendeman, S., Broadway, N., Hartmann, D., Saftig, P., Umland, S. et al. (2006). ADAM10 is a principal 'shedase' of the low-affinity immunoglobulin E receptor CD23. *Nat. Immunol.* **7**, 1293-1298.
- Weskamp, G., Mendelson, K., Swendeman, S., Le Gall, S., Ma, Y., Lyman, S., Hinoki, A., Eguchi, S., Guaiquil, V., Horiuchi, K. et al. (2010). Pathological neovascularization is reduced by inactivation of ADAM17 in endothelial cells but not in pericytes. *Circ. Res.* **106**, 932-940.
- White, J. M. (2003). ADAMs: modulators of cell-cell and cell-matrix interactions. *Curr. Opin. Cell Biol.* **15**, 598-606.
- Wild-Bode, C., Fellerer, K., Kugler, J., Haass, C. and Capell, A. (2006). A basolateral sorting signal directs ADAM10 to adherens junctions and is required for its function in cell migration. *J. Biol. Chem.* **281**, 23824-23829.
- Wolfsberg, T. G., Bazan, J. F., Blobel, C. P., Myles, D. G., Primakoff, P. and White, J. M. (1993). The precursor region of a protein active in sperm-egg fusion contains a metalloprotease and a disintegrin domain: structural, functional, and evolutionary implications. *Proc. Natl. Acad. Sci. USA* **90**, 10783-10787.
- Xie, B., Shen, J., Dong, A., Swaim, M., Hackett, S. F., Wyder, L., Worpenberg, S., Barbieri, S. and Campochiaro, P. A. (2008). An Adam15 amplification loop promotes vascular endothelial growth factor-induced ocular neovascularization. *FASEB J.* **22**, 2775-2783.
- Xu, H., Zhu, J., Smith, S., Foldi, J., Zhao, B., Chung, A. Y., Outtz, H., Kitajewski, J., Shi, C., Weber, S. et al. (2012). Notch-RBP-J signaling regulates the transcription factor IRF8 to promote inflammatory macrophage polarization. *Nat. Immunol.* **13**, 642-650.
- Yagami-Hiromasa, T., Sato, T., Kurisaki, T., Kamijo, K., Nabeshima, Y. and Fujisawa-Sehara, A. (1995). A metalloprotease-disintegrin participating in myoblast fusion. *Nature* **377**, 652-656.
- Yoda, M., Kimura, T., Tohmonda, T., Uchikawa, S., Koba, T., Takito, J., Morioka, H., Matsumoto, M., Link, D. C., Chiba, K. et al. (2011). Dual functions of cell-autonomous and non-cell-autonomous ADAM10 activity in granulopoiesis. *Blood* **118**, 6939-6942.
- Yumoto, N., Wakatsuki, S., Kurisaki, T., Hara, Y., Osumi, N., Frisen, J. and Sehara-Fujisawa, A. (2008). Meltrin beta/ADAM19 interacting with EphA4 in developing neural cells participates in formation of the neuromuscular junction. *PLoS ONE* **3**, e3322.
- Zack, M. D., Melton, M. A., Stock, J. L., Storer, C. E., Barve, R. A., Minnerly, J. C., Weiss, D. J., Stejskal, J. A., Tortorella, M. D., Turk, J. R. et al. (2009).



- Reduced incidence and severity of experimental autoimmune arthritis in mice expressing catalytically inactive A disintegrin and metalloproteinase 8 (ADAM8). *Clin. Exp. Immunol.* **158**, 246-256.
- Zhao, J., Chen, H., Wang, Y. L. and Warburton, D.** (2001). Abrogation of tumor necrosis factor- $\alpha$  converting enzyme inhibits embryonic lung morphogenesis in culture. *Int. J. Dev. Biol.* **45**, 623-631.
- Zheng, Y., Saftig, P., Hartmann, D. and Blobel, C.** (2004). Evaluation of the contribution of different ADAMs to tumor necrosis factor  $\alpha$  (TNF $\alpha$ ) shedding and of the function of the TNF $\alpha$  ectodomain in ensuring selective stimulated shedding by the TNF $\alpha$  convertase (TACE/ADAM17). *J. Biol. Chem.* **279**, 42898-42906.
- Zhong, J. L., Poghosyan, Z., Pennington, C. J., Scott, X., Handsley, M. M., Warn, A., Gavrilovic, J., Honert, K., Kruger, A., Span, P. N. et al.** (2008). Distinct functions of natural ADAM-15 cytoplasmic domain variants in human mammary carcinoma. *Mol. Cancer Res.* **6**, 383-394.
- Zhou, H. M., Weskamp, G., Chesneau, V., Sahin, U., Vortkamp, A., Horiuchi, K., Chiusaroli, R., Hahn, R., Wilkes, D., Fisher, P. et al.** (2004). Essential role for ADAM19 in cardiovascular morphogenesis. *Mol. Cell. Biol.* **24**, 96-104.
- Zolkiewska, A.** (1999). Disintegrin-like/cysteine-rich region of ADAM 12 is an active cell adhesion domain. *Exp. Cell. Res.* **252**, 423-431.
- Zou, J., Zhang, R., Zhu, F., Liu, J., Madison, V. and Umland, S. P.** (2005). ADAM33 enzyme properties and substrate specificity. *Biochemistry* **44**, 4247-4256.
